# Supplementary material for: Acridine-based copper(i) PNP pincer complexes: catalysts for alkyne hydroboration and borylation of aryl halides
Source: Royal Society of Chemistry journal article supplement (doi:10.1039/d3dt04269c), 2024-01-01

Supporting Information

**Acridine-based copper(I) PNP pincer complexes: catalysts for alkyne hydroboration and borylation of aryl halides**

Angus Olding,<sup>a</sup> Nigel T. Lucas,<sup>b</sup> Curtis C. Ho,<sup>a\*</sup> Alex C. Bissember<sup>a\*</sup>

<sup>a</sup> *School of Natural Sciences – Chemistry, University of Tasmania, Hobart, Tasmania, Australia.*

<sup>b</sup> *Department of Chemistry, University of Otago, Dunedin, Otago, New Zealand.*

Correspondence to: [curtis.ho@utas.edu.au](mailto:curtis.ho@utas.edu.au); [alex.bissember@utas.edu.au](mailto:alex.bissember@utas.edu.au)

**Supporting Information**

**Table of Contents**

|           |                                   |            |
|-----------|-----------------------------------|------------|
| <b>I.</b> | <b>NMR, IR &amp; Mass Spectra</b> | <b>S-2</b> |
|-----------|-----------------------------------|------------|

# I. NMR, IR & Mass Spectra

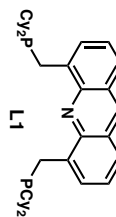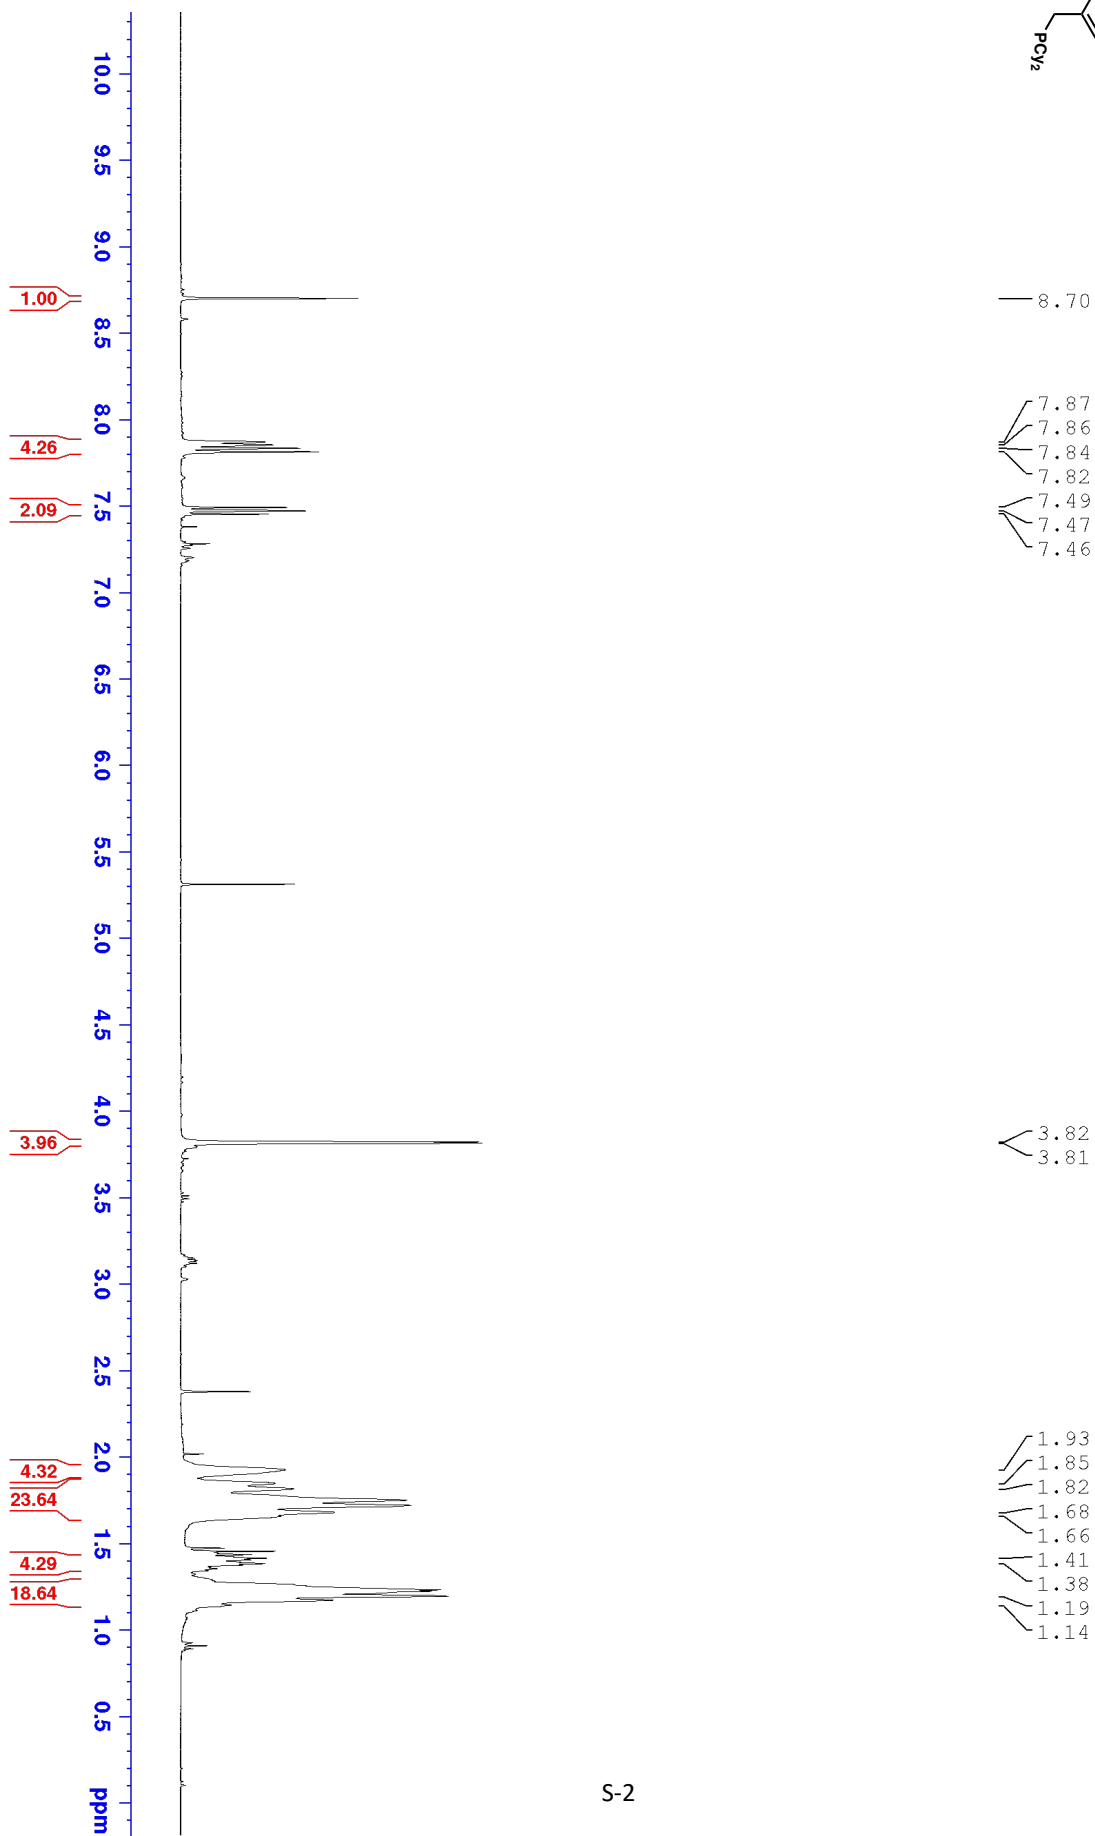

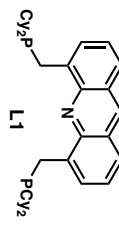

- 147.03
- 147.00
- 139.97
- 139.89
- 136.39
- 129.95
- 129.82
- 126.72
- 125.70
- 125.67
- 125.56
- 125.54

- 34.15
- 34.01
- 30.12
- 30.00
- 29.88
- 29.78
- 27.65
- 27.59
- 27.55
- 27.51
- 26.71
- 23.36
- 23.19

<sup>13</sup>C NMR experiment performed at 25 °C in CDCl<sub>3</sub>

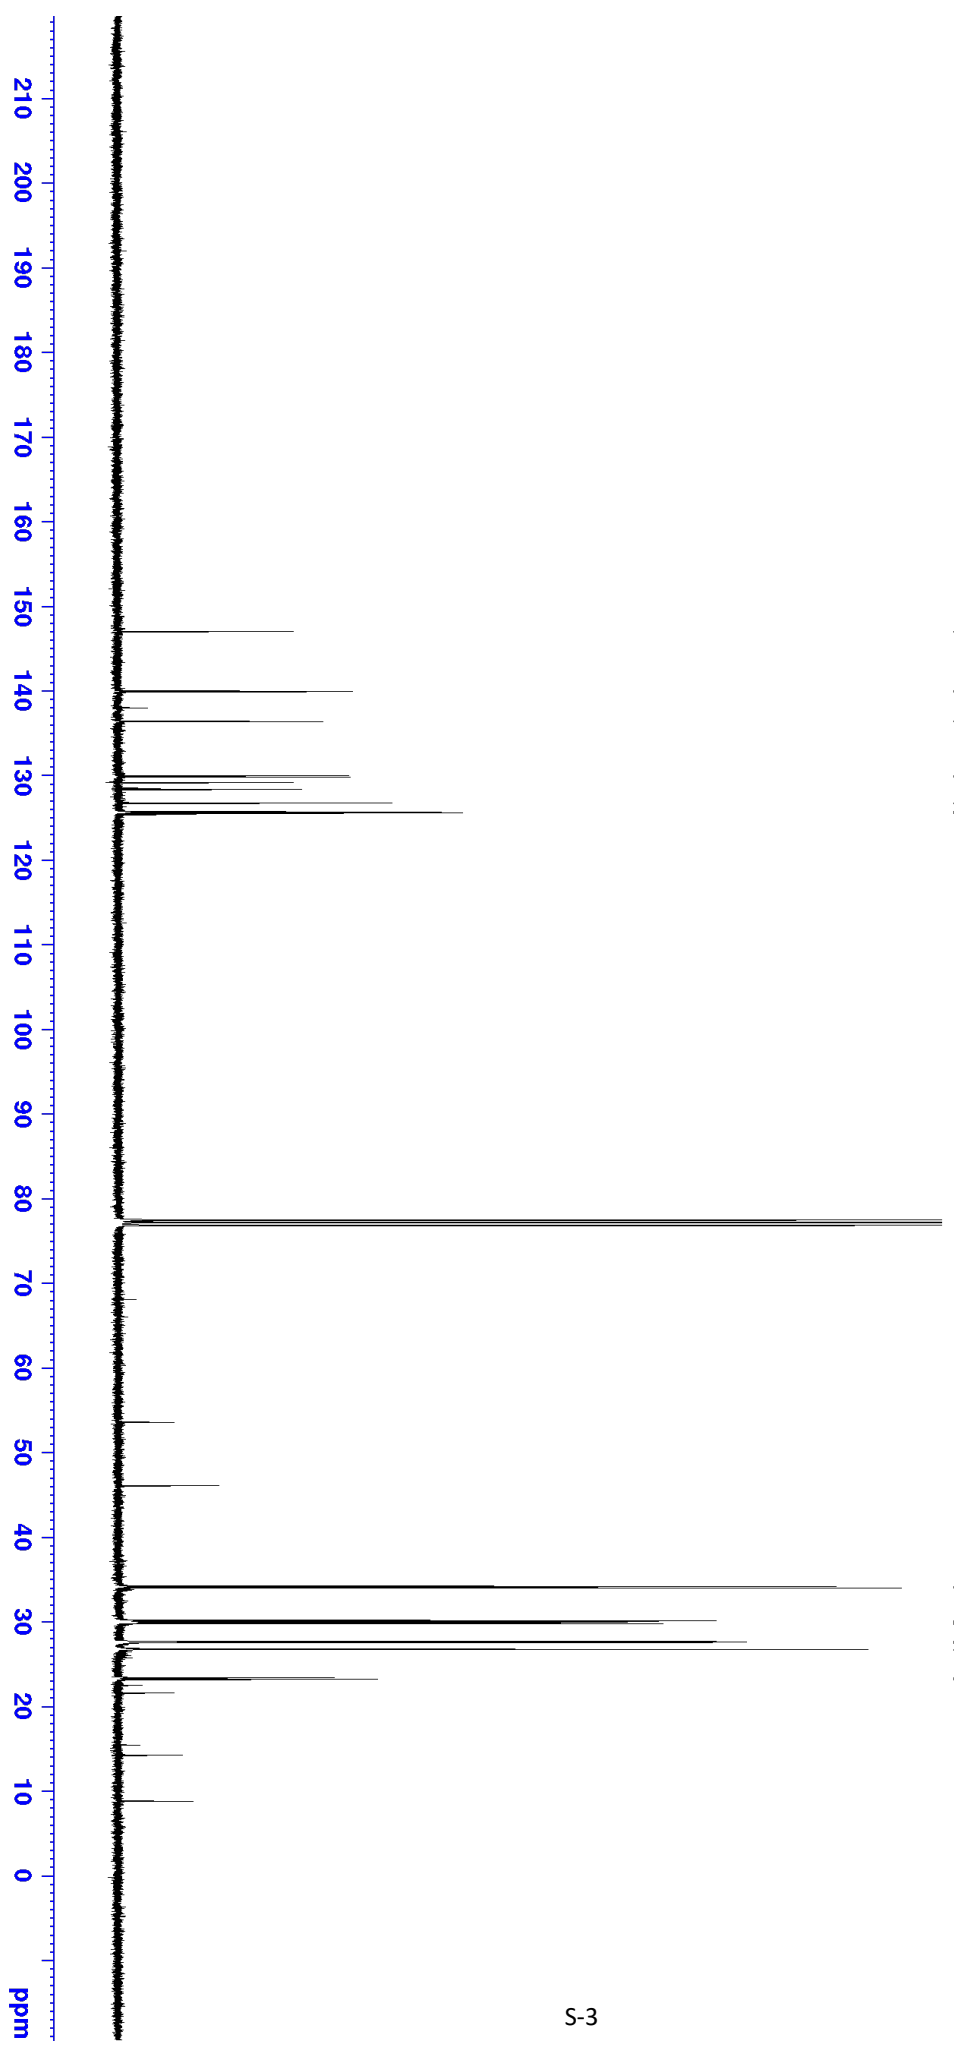



<sup>31</sup>P NMR experiment performed at 25 °C in CDCl<sub>3</sub>

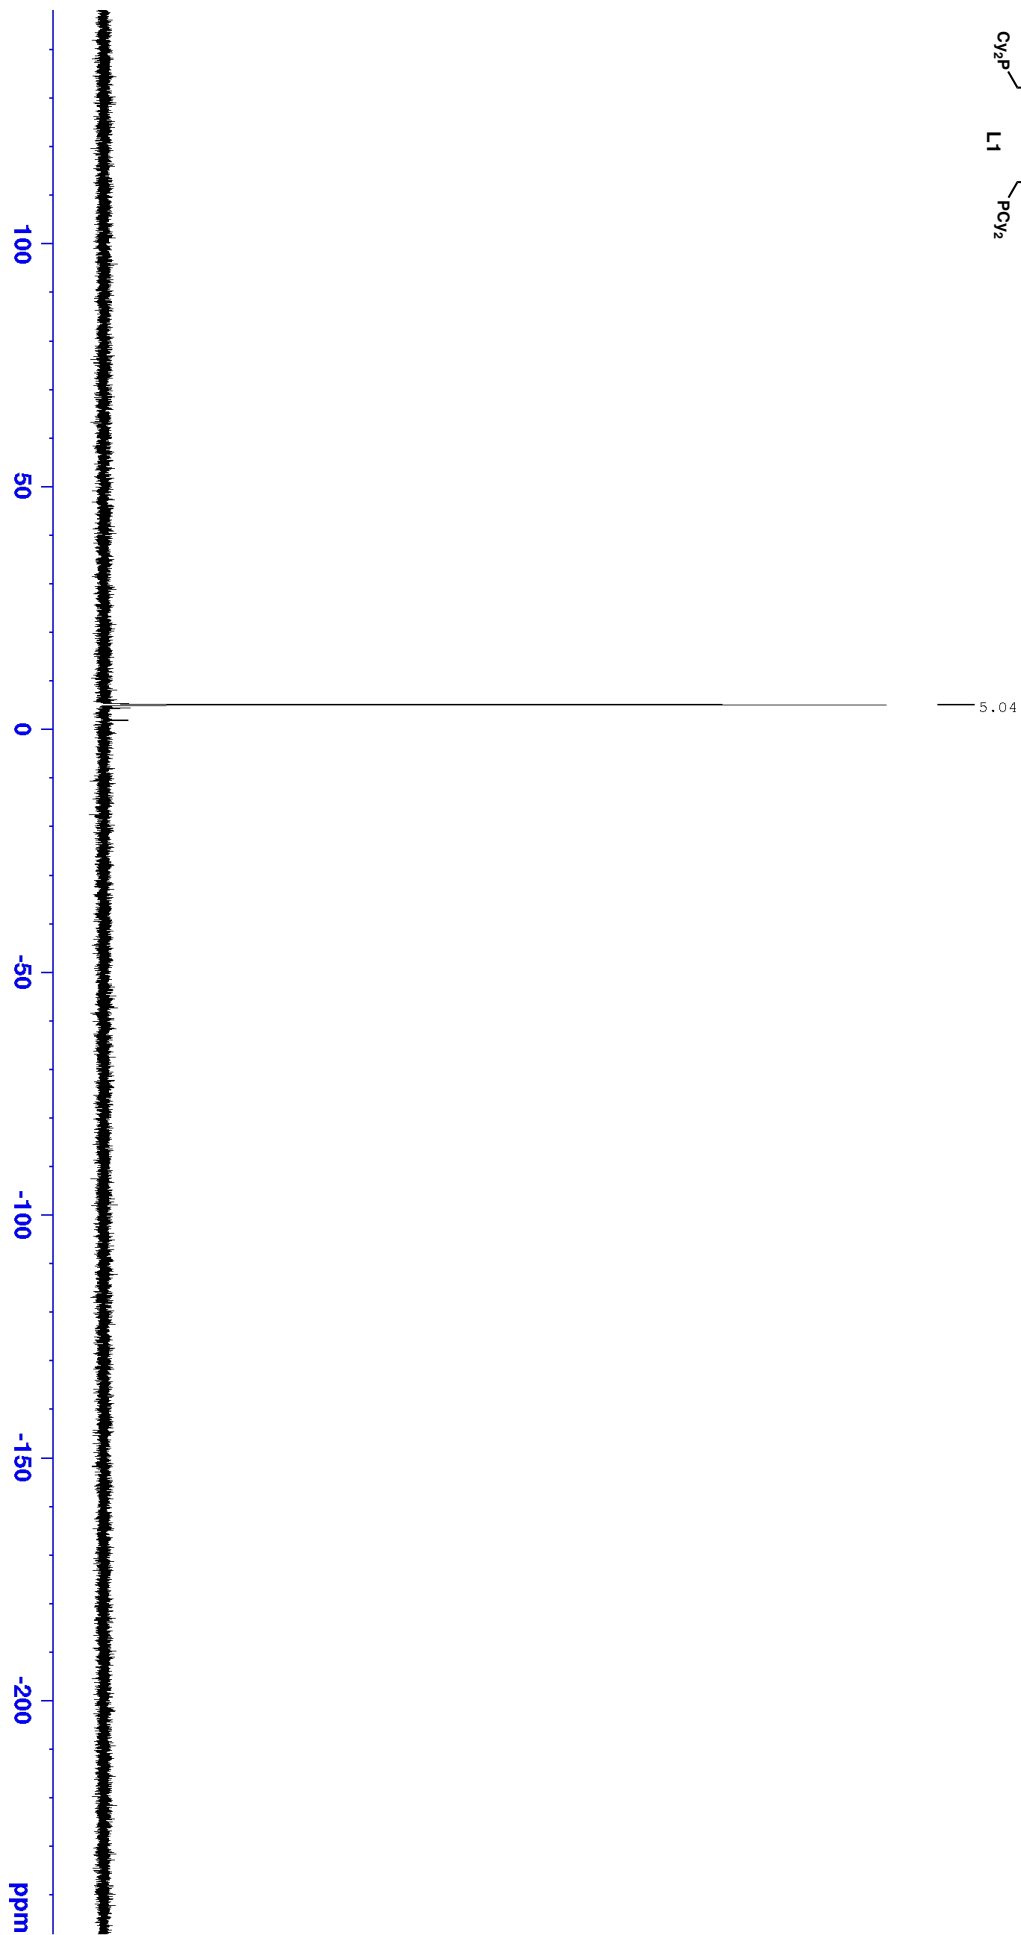

# IR spectrum

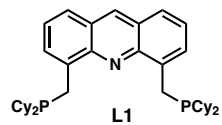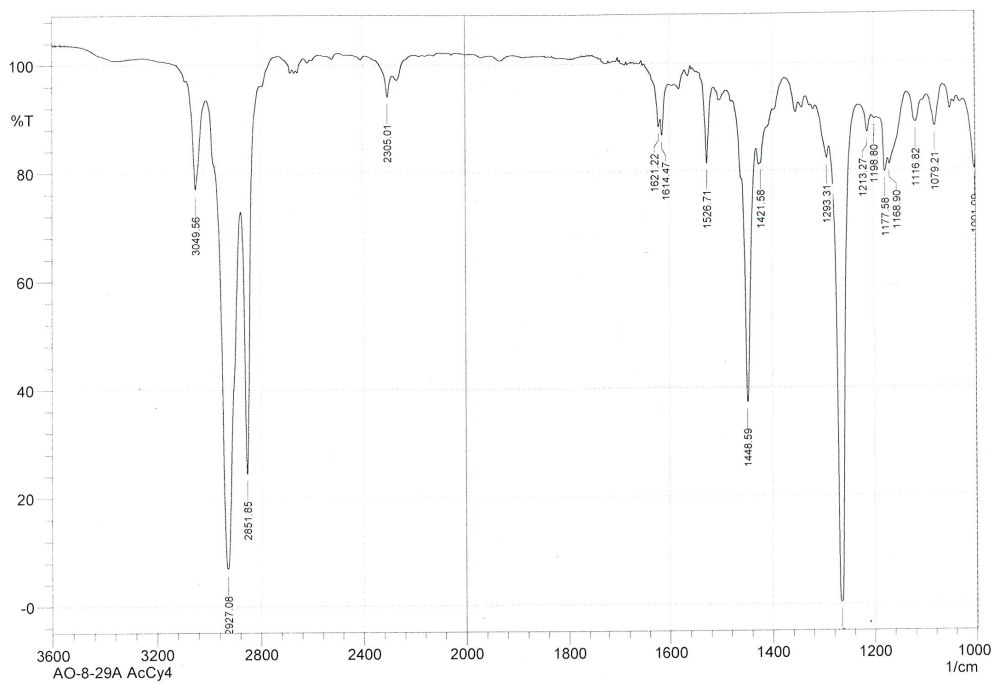

| No. | Peak    | Intensity | Corr. Intensity | Base (H) | Base (L) | Area  | Corr. Area |
|-----|---------|-----------|-----------------|----------|----------|-------|------------|
| 1   | 1001.09 | 80.13     | 2.67            | 1023.27  | 999.16   | 1.42  | 0.07       |
| 2   | 1079.21 | 88        | 6.65            | 1093.67  | 1063.78  | 1.1   | 0.4        |
| 3   | 1116.82 | 88.74     | 4.63            | 1133.22  | 1105.25  | 1.09  | 0.27       |
| 4   | 1168.9  | 80.99     | 1.95            | 1171.79  | 1134.18  | 2.24  | 0.2        |
| 5   | 1177.58 | 79.64     | 3.95            | 1193.98  | 1172.76  | 1.44  | 0.1        |
| 6   | 1198.8  | 89.49     | 0.33            | 1203.62  | 1194.94  | 0.41  | 0.01       |
| 7   | 1213.27 | 86.99     | 3.77            | 1229.66  | 1204.59  | 1.16  | 0.13       |
| 8   | 1265.35 | 0.29      | 87.12           | 1288.49  | 1230.63  | 24.52 | 21.37      |
| 9   | 1293.31 | 82.17     | 3.3             | 1314.53  | 1289.46  | 1.55  | 0.16       |
| 10  | 1421.58 | 81.34     | 0.87            | 1423.51  | 1399.4   | 1.45  | 0.01       |
| 11  | 1448.59 | 37.33     | 50.04           | 1476.56  | 1431.23  | 6.97  | 4.51       |
| 12  | 1526.71 | 81.39     | 15.34           | 1542.14  | 1514.17  | 0.99  | 0.6        |
| 13  | 1614.47 | 86.64     | 4.12            | 1617.37  | 1600.97  | 0.57  | 0.09       |
| 14  | 1621.22 | 88.22     | 2.32            | 1648.23  | 1618.33  | 0.6   | 0.04       |
| 15  | 2305.01 | 94        | 4.87            | 2348.41  | 2284.76  | 0.58  | 0.41       |
| 16  | 2851.85 | 24.39     | 55.87           | 2876.92  | 2798.8   | 14.7  | 9.02       |
| 17  | 2927.08 | 6.91      | 73.65           | 3008.09  | 2877.89  | 47.16 | 36.22      |
| 18  | 3049.56 | 76.97     | 18.42           | 3085.24  | 3009.05  | 4.22  | 2.6        |

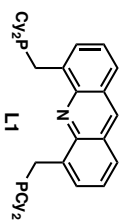

D:\2023\_Chemistry\AO-8-29B

03/02/23 09:30:50

### HRESIMS experiment

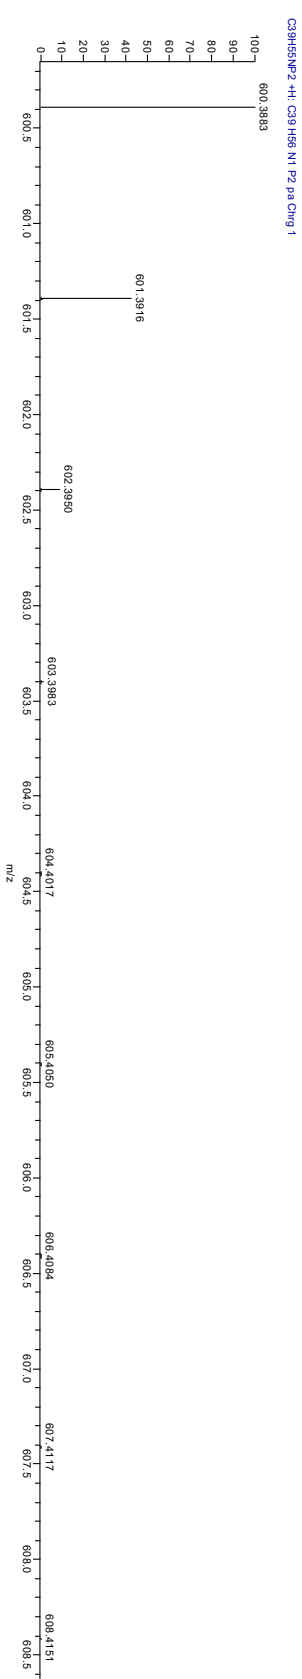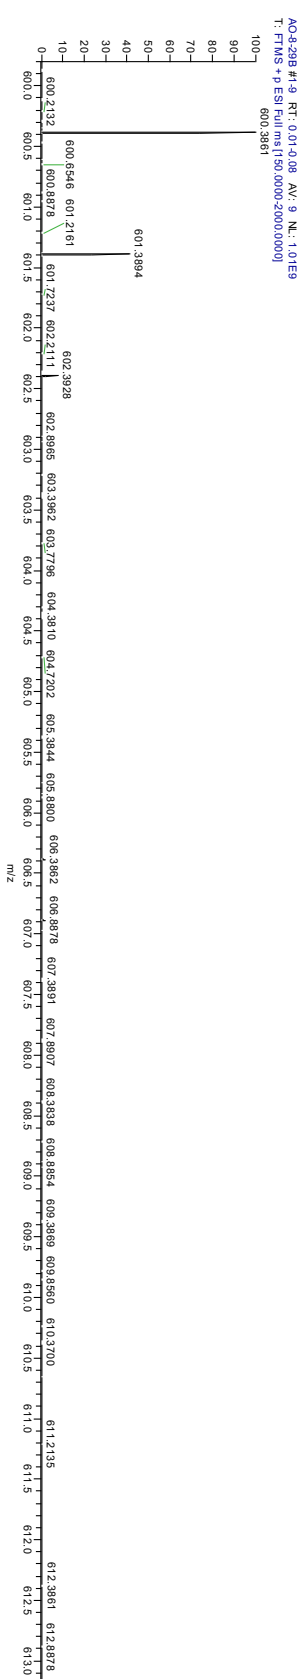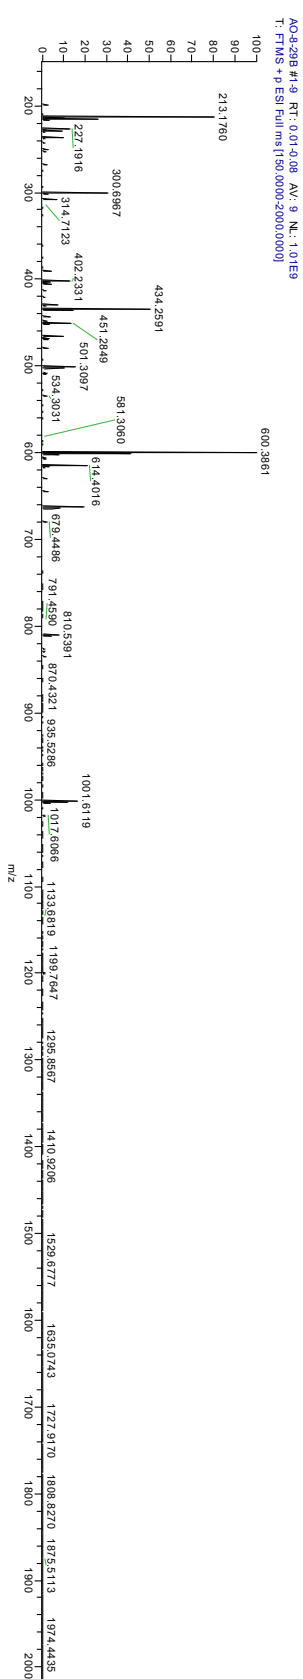

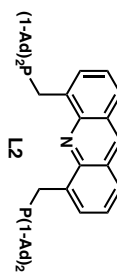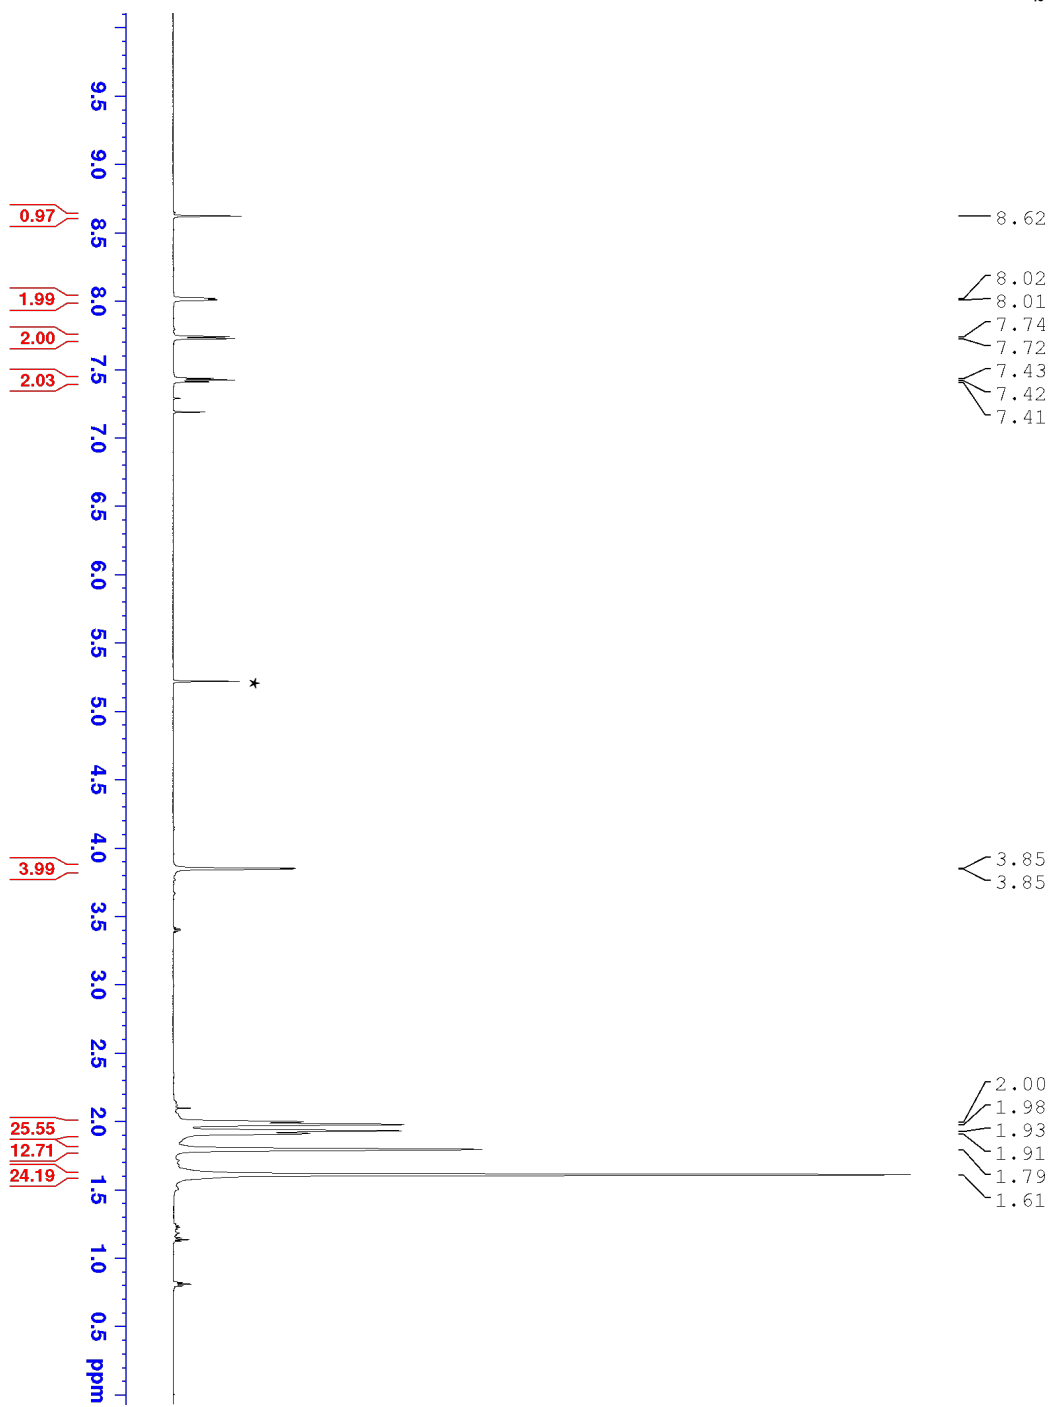

<sup>1</sup>H NMR experiment performed at 25 °C in CDCl<sub>3</sub>

\* = CH<sub>2</sub>Cl<sub>2</sub>

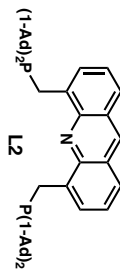

- 146.69
- 146.66
- 141.82
- 141.73
- 136.49
- 130.46
- 130.34
- 126.63
- 125.72
- 125.26

- 40.99
- 40.92
- 37.23
- 36.93
- 36.78
- 28.89
- 28.84
- 17.39
- 17.27

\* = CH<sub>2</sub>Cl<sub>2</sub>

<sup>13</sup>C NMR experiment performed at 25 °C in CDCl<sub>3</sub>

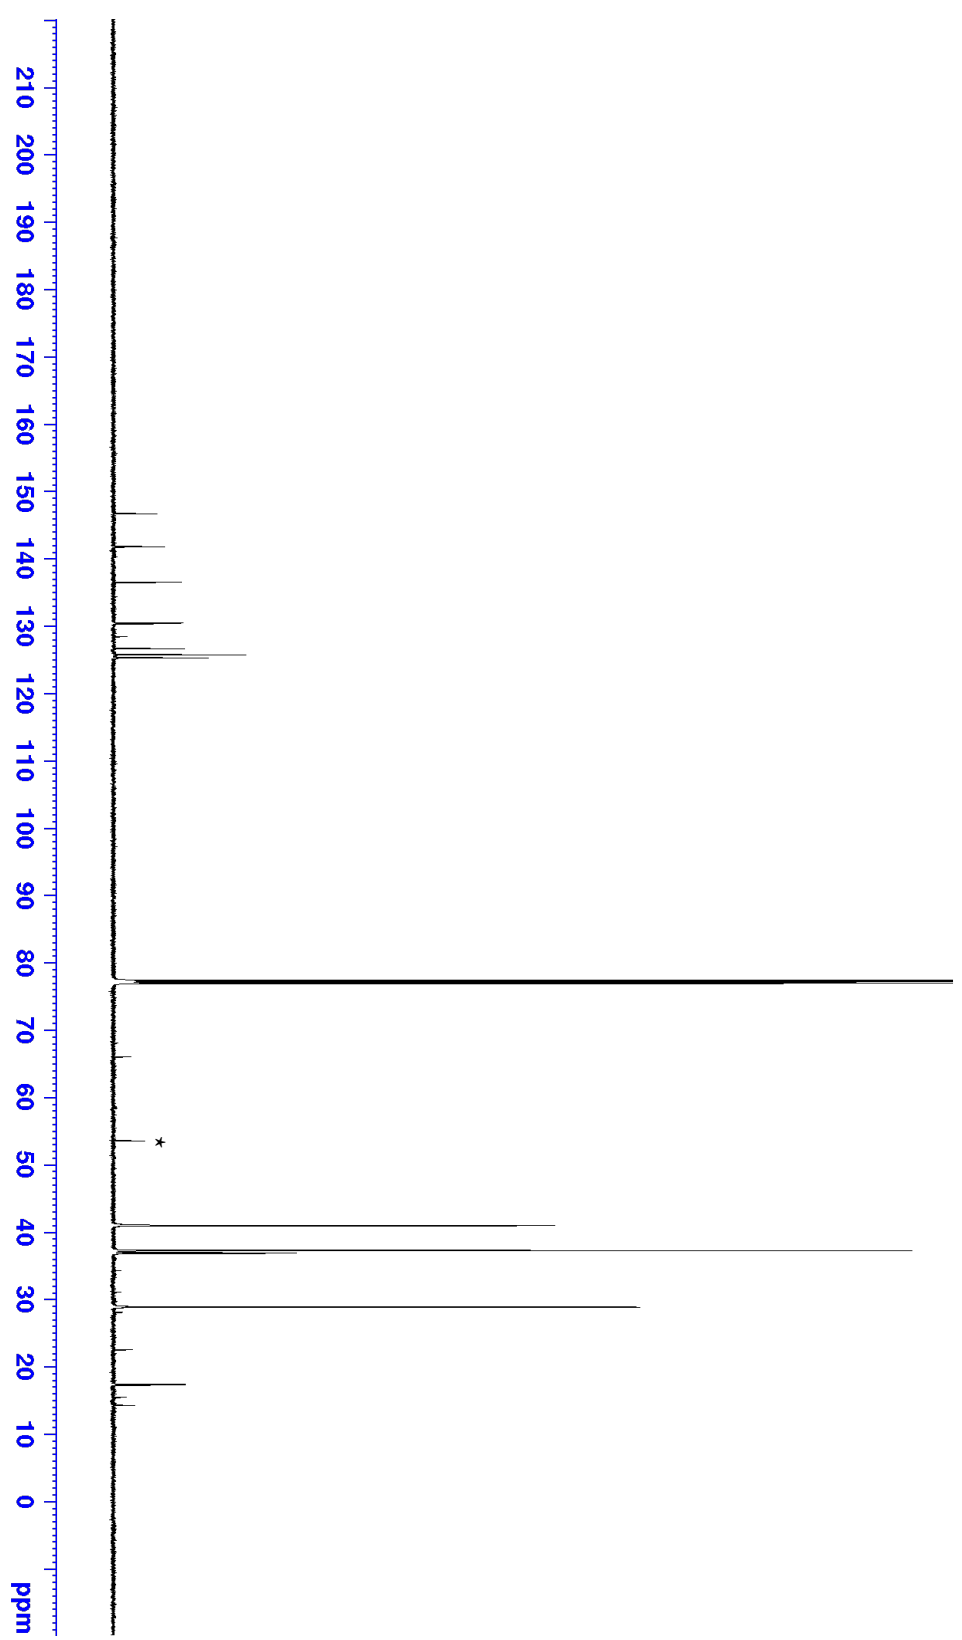



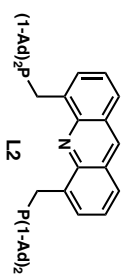

<sup>31</sup>P NMR experiment performed at 25 °C in CDCl<sub>3</sub>

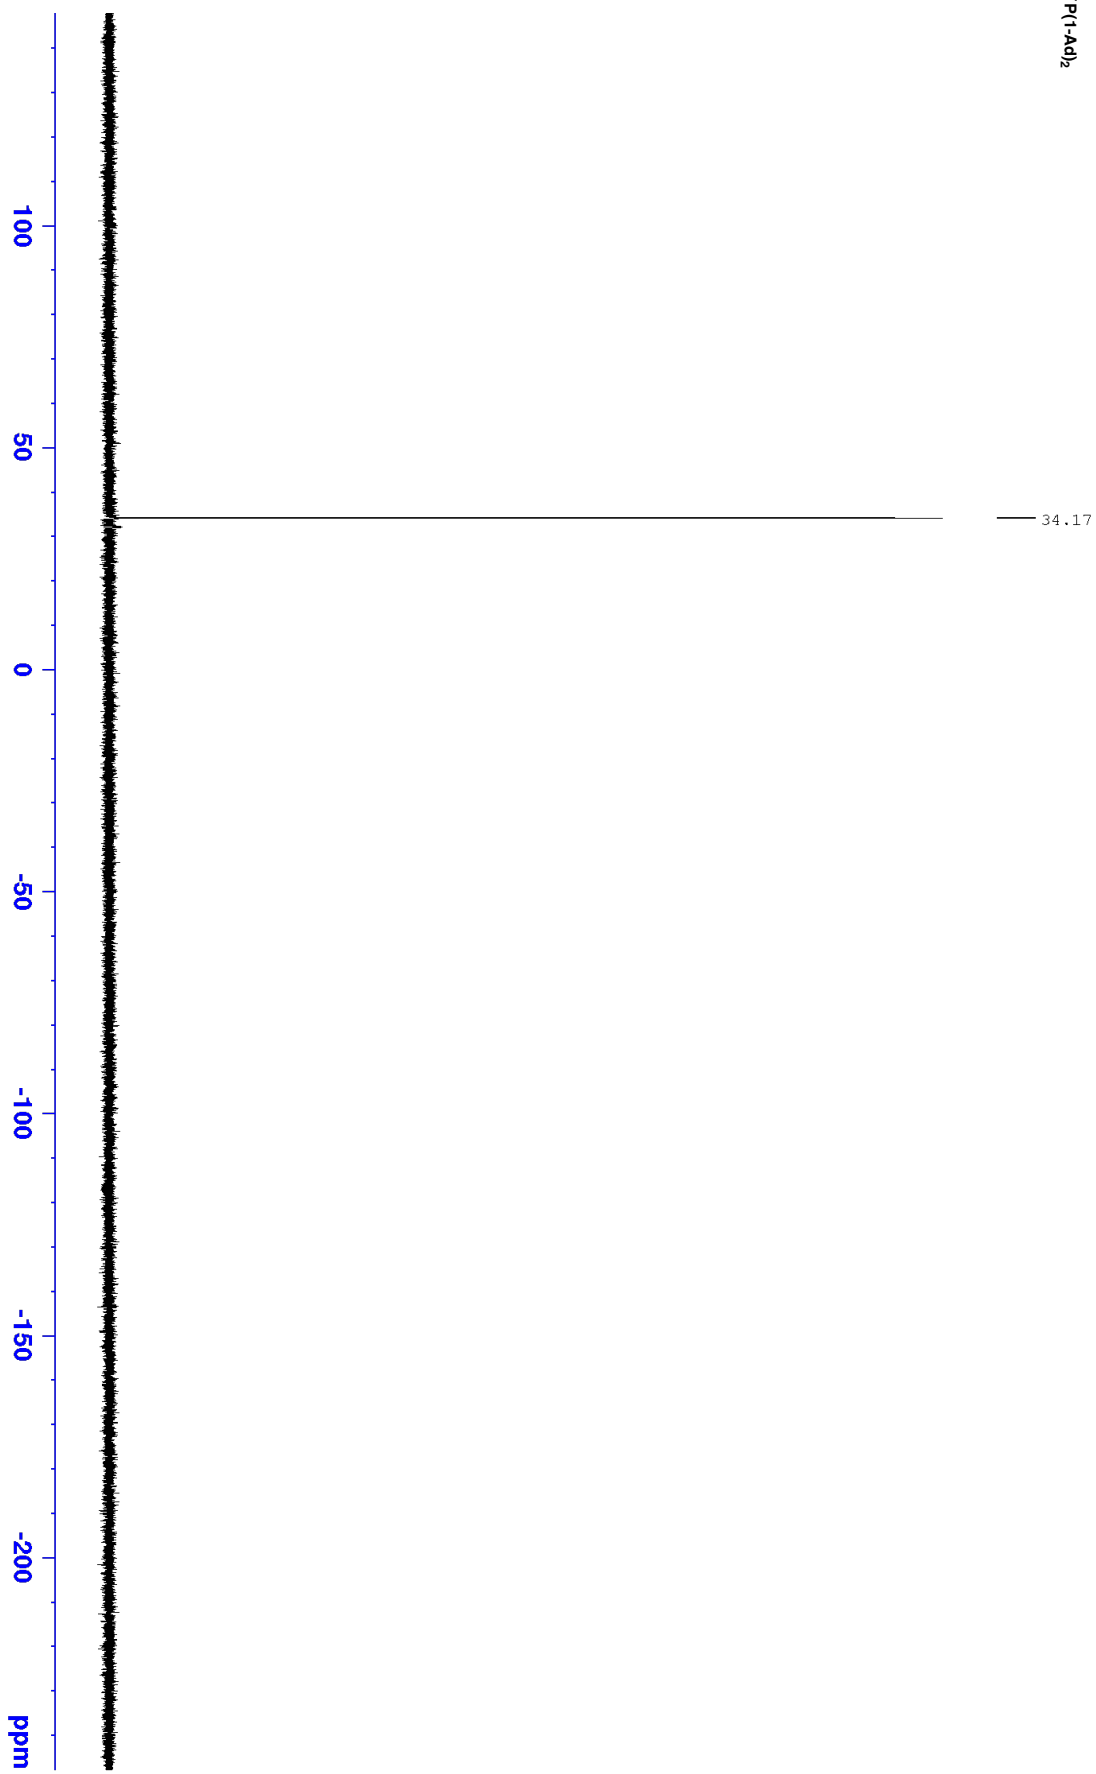

## IR spectrum

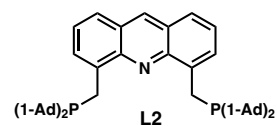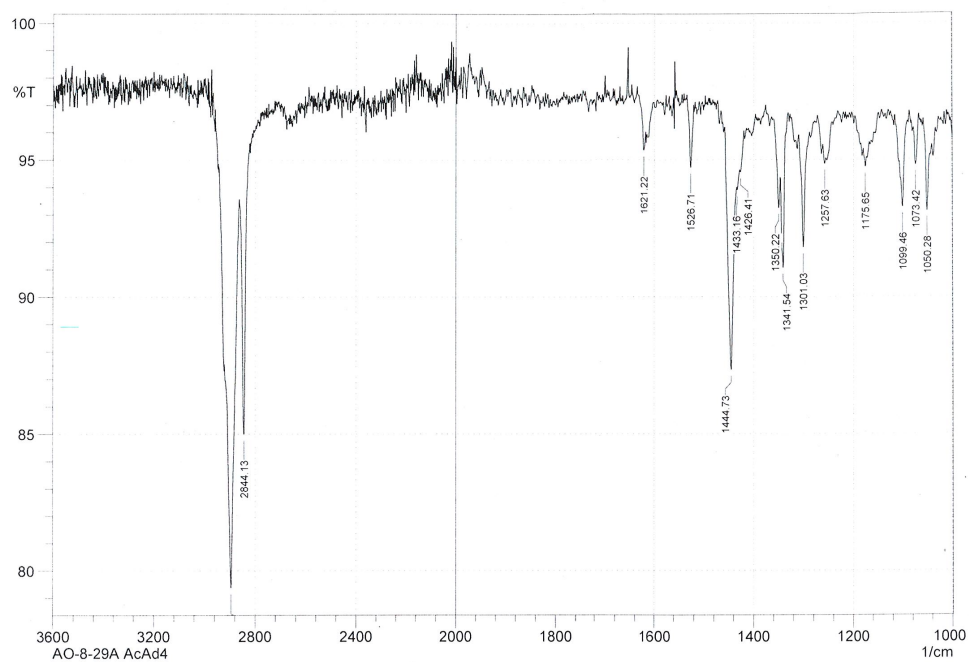

| No. | Peak    | Intensity | Corr. Intensity | Base (H) | Base (L) | Area  | Corr. Area |
|-----|---------|-----------|-----------------|----------|----------|-------|------------|
| 1   | 1050.28 | 93.14     | 2.853           | 1057.99  | 1041.6   | 0.377 | 0.081      |
| 2   | 1073.42 | 94.816    | 1.484           | 1077.28  | 1067.64  | 0.192 | 0.037      |
| 3   | 1099.46 | 93.272    | 3.204           | 1114.89  | 1089.82  | 0.546 | 0.158      |
| 4   | 1175.65 | 94.751    | 0.471           | 1179.51  | 1172.76  | 0.15  | 0.007      |
| 5   | 1257.63 | 94.863    | 0.361           | 1261.49  | 1255.7   | 0.128 | 0.006      |
| 6   | 1301.03 | 91.814    | 4.136           | 1309.71  | 1288.49  | 0.527 | 0.147      |
| 7   | 1341.54 | 91.064    | 4.011           | 1346.36  | 1331.89  | 0.387 | 0.101      |
| 8   | 1350.22 | 93.254    | 1.553           | 1360.82  | 1347.32  | 0.313 | 0.034      |
| 9   | 1426.41 | 94.558    | 0.387           | 1428.34  | 1420.62  | 0.17  | 0.009      |
| 10  | 1433.16 | 93.906    | 0.198           | 1434.12  | 1428.34  | 0.149 | 0.003      |
| 11  | 1444.73 | 87.354    | 7.499           | 1458.23  | 1435.09  | 0.932 | 0.415      |
| 12  | 1526.71 | 94.733    | 2.431           | 1534.42  | 1520.92  | 0.24  | 0.072      |
| 13  | 1621.22 | 95.355    | 1.014           | 1635.69  | 1617.37  | 0.28  | 0.025      |
| 14  | 2844.13 | 85        | 9.535           | 2863.42  | 2822.92  | 1.612 | 0.636      |
| 15  | 2895.25 | 79.37     | 10.305          | 2917.43  | 2864.39  | 3.641 | 1.267      |

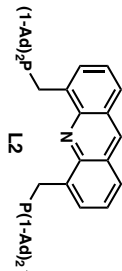

D:\2023\_Chemistry\A0-8-29A

03/02/23 09:28:42

HRESIMS experiment

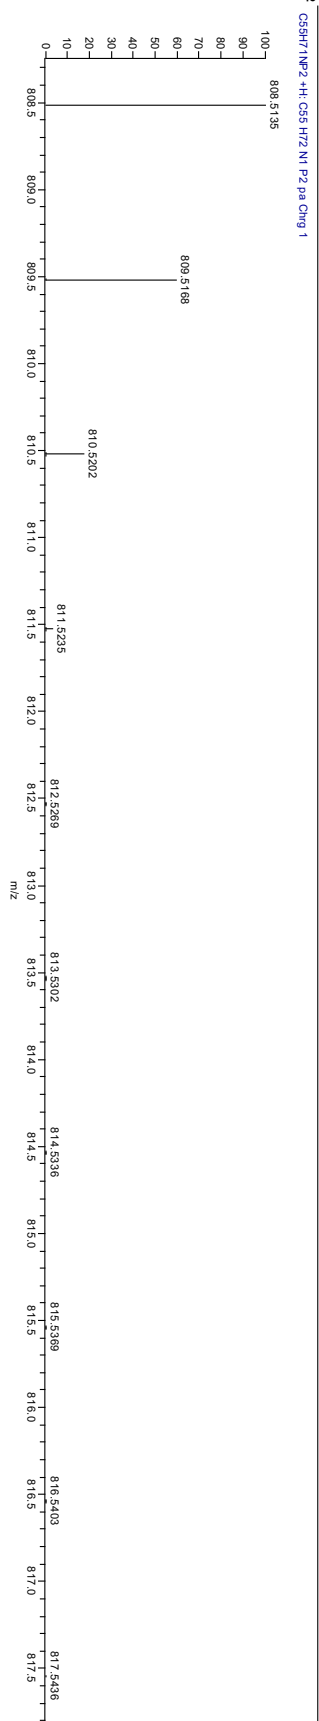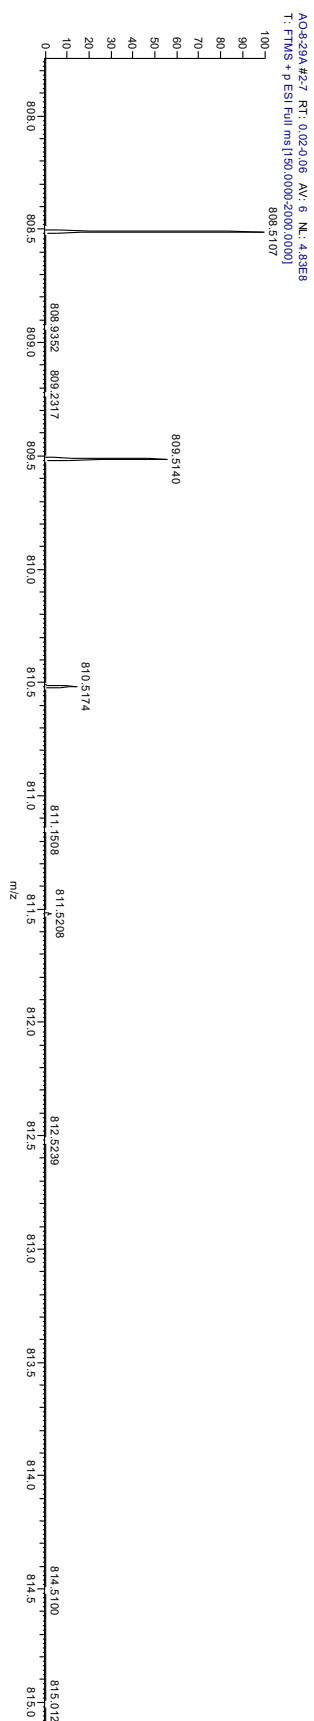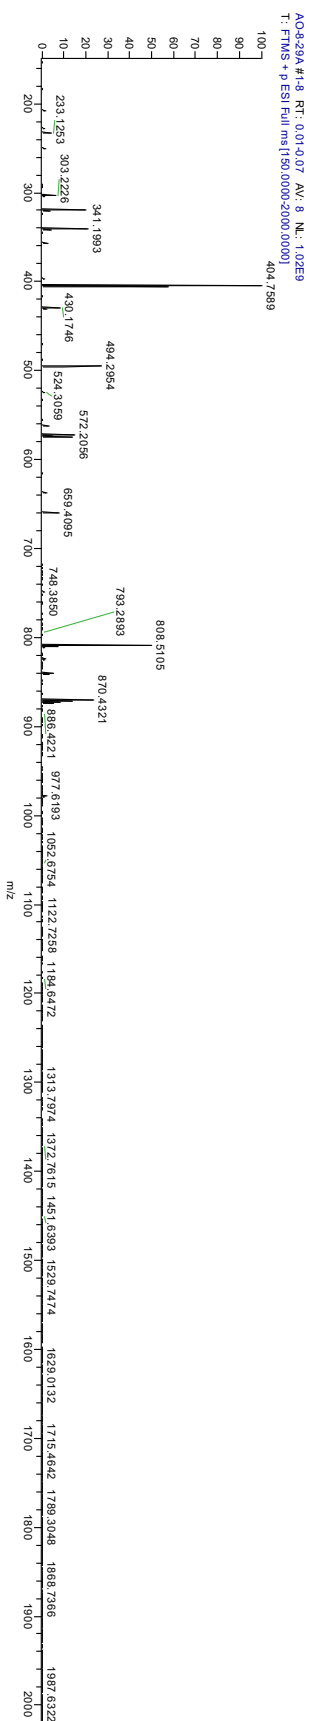

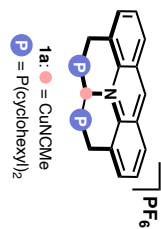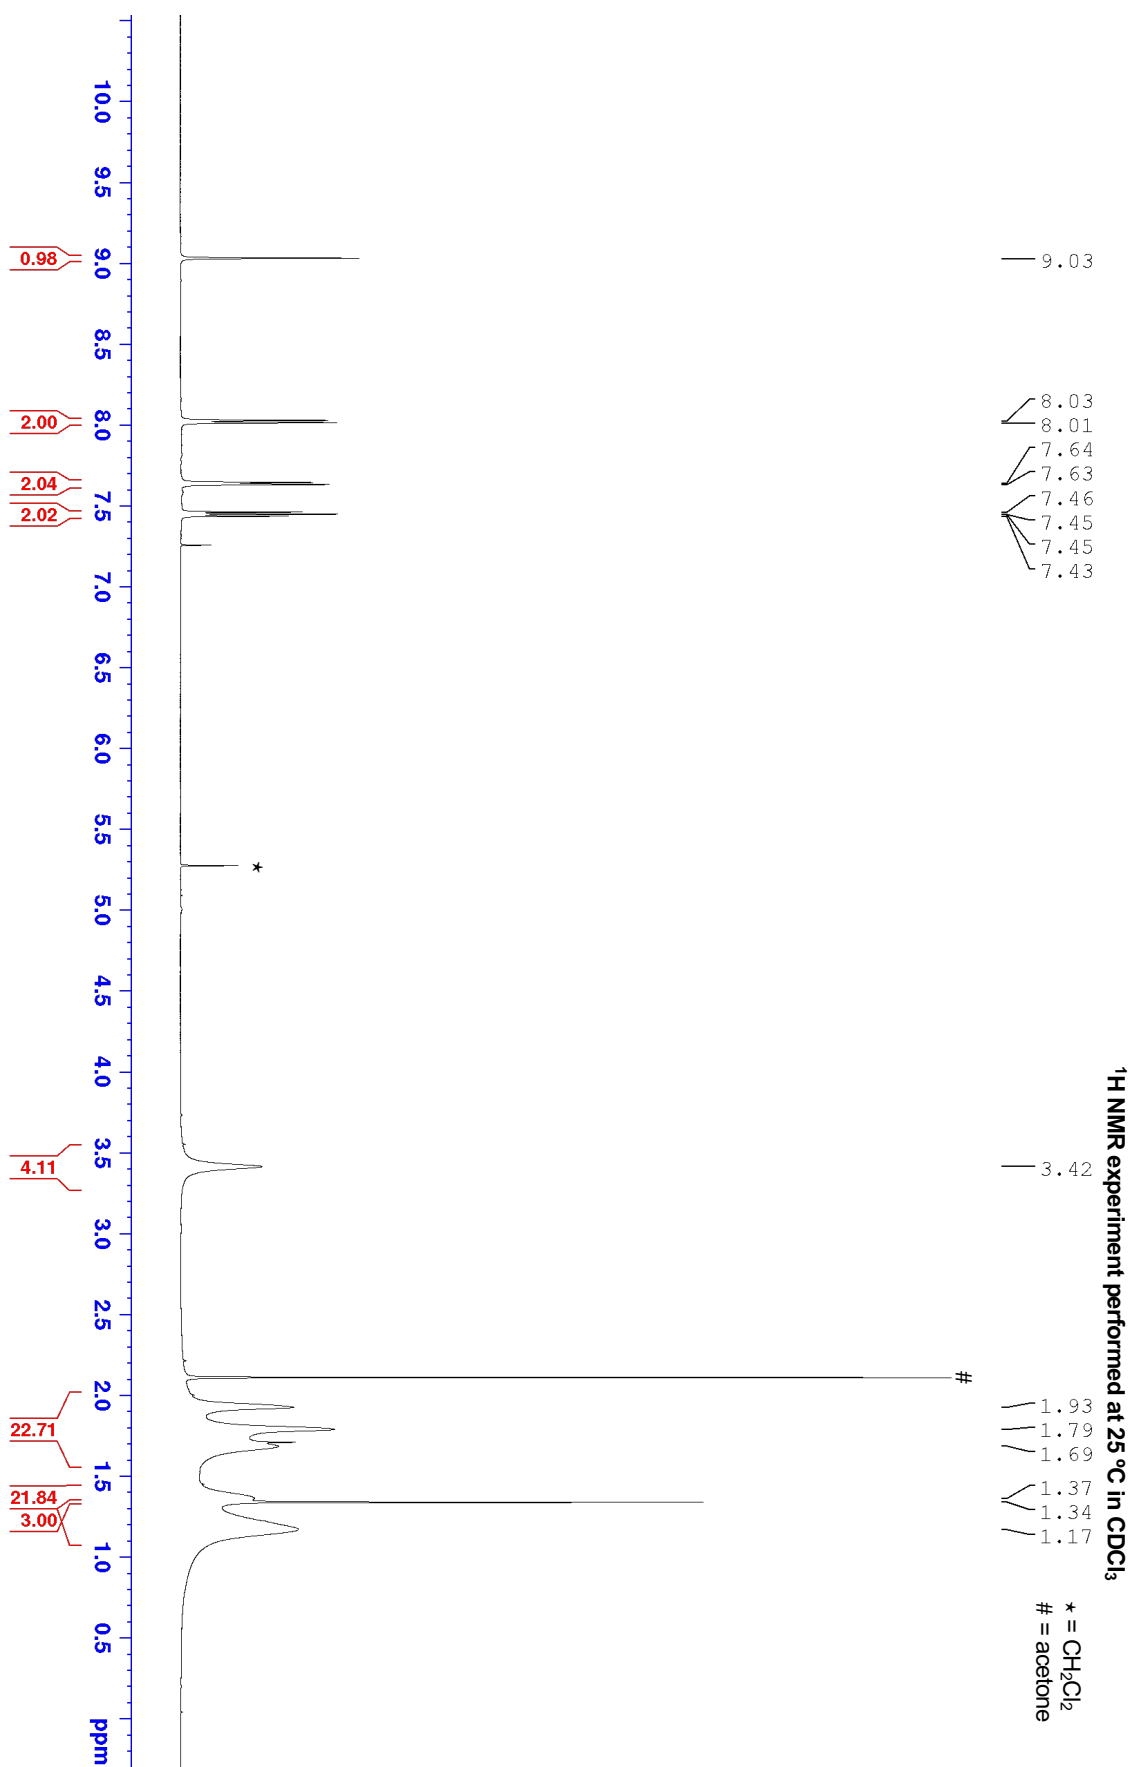

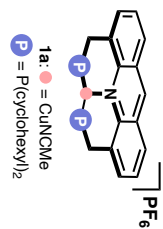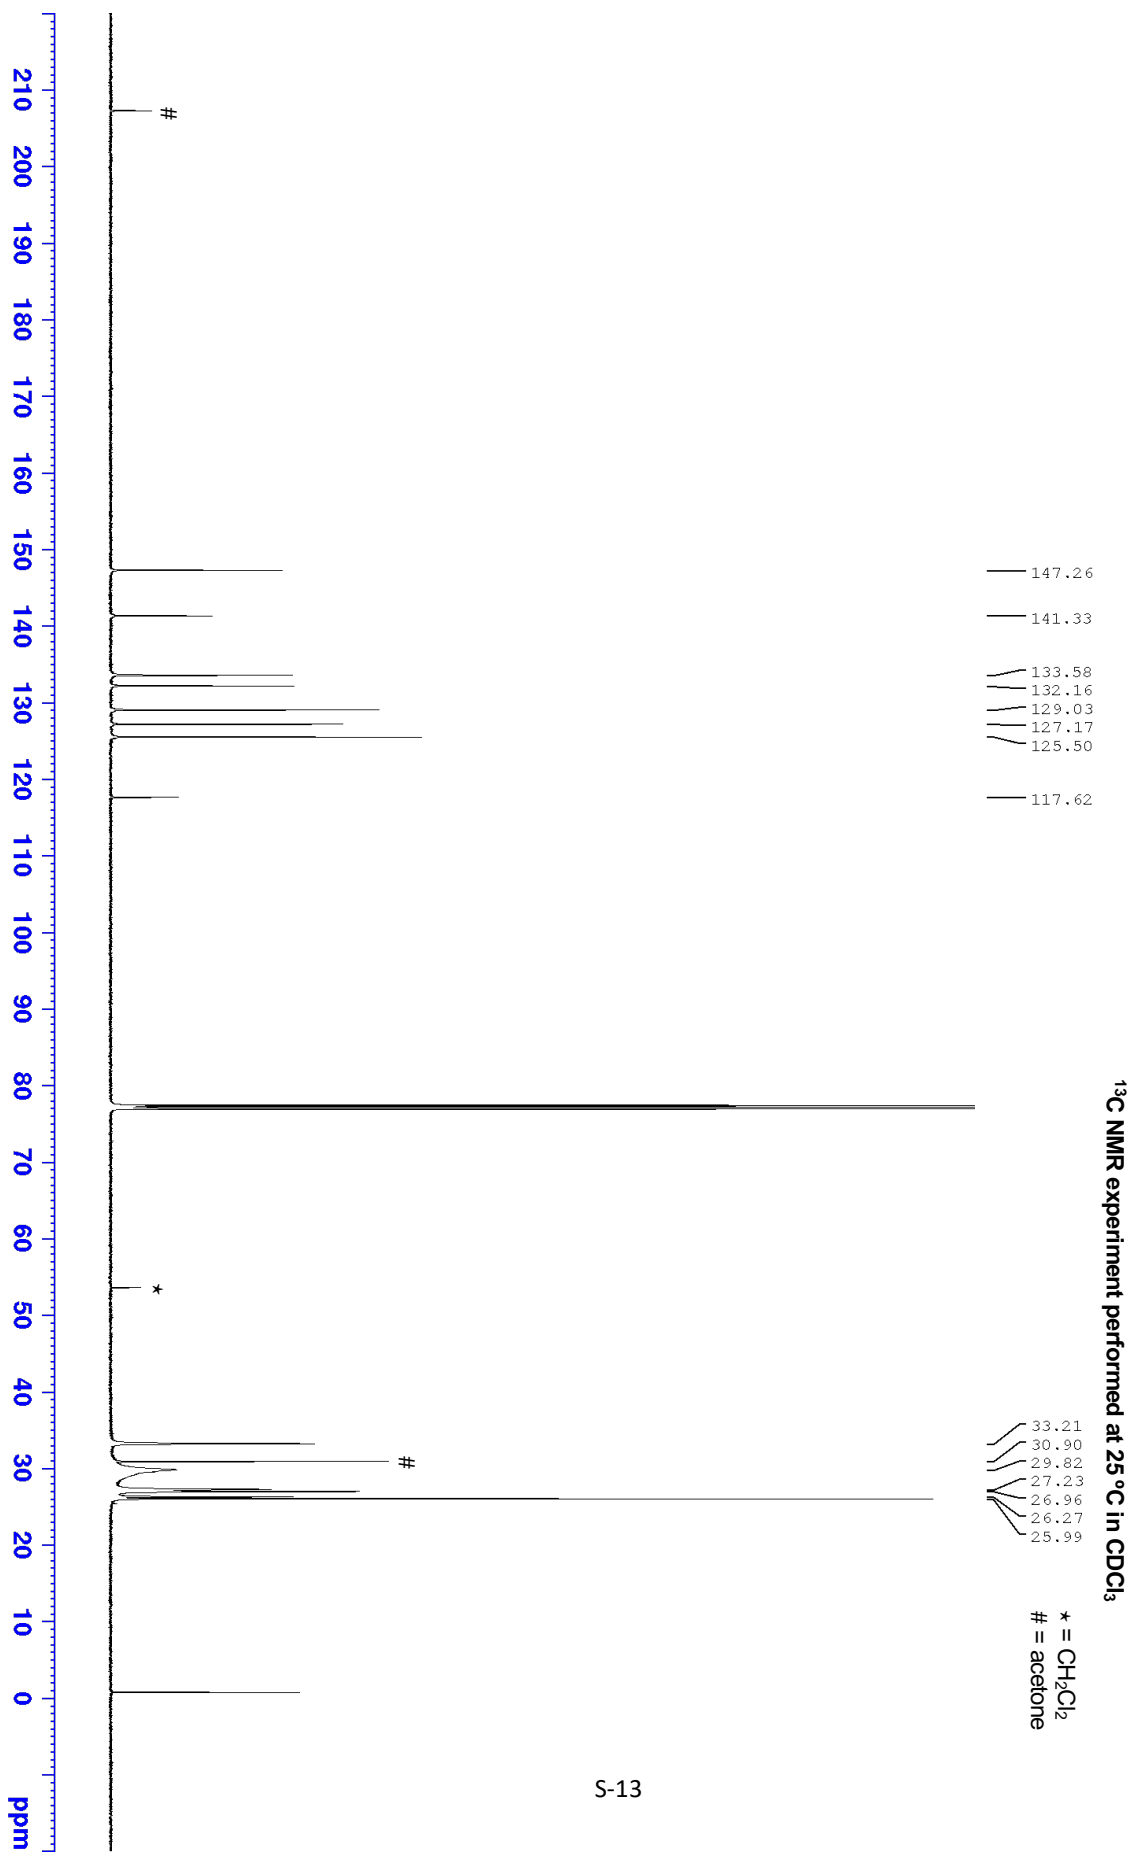

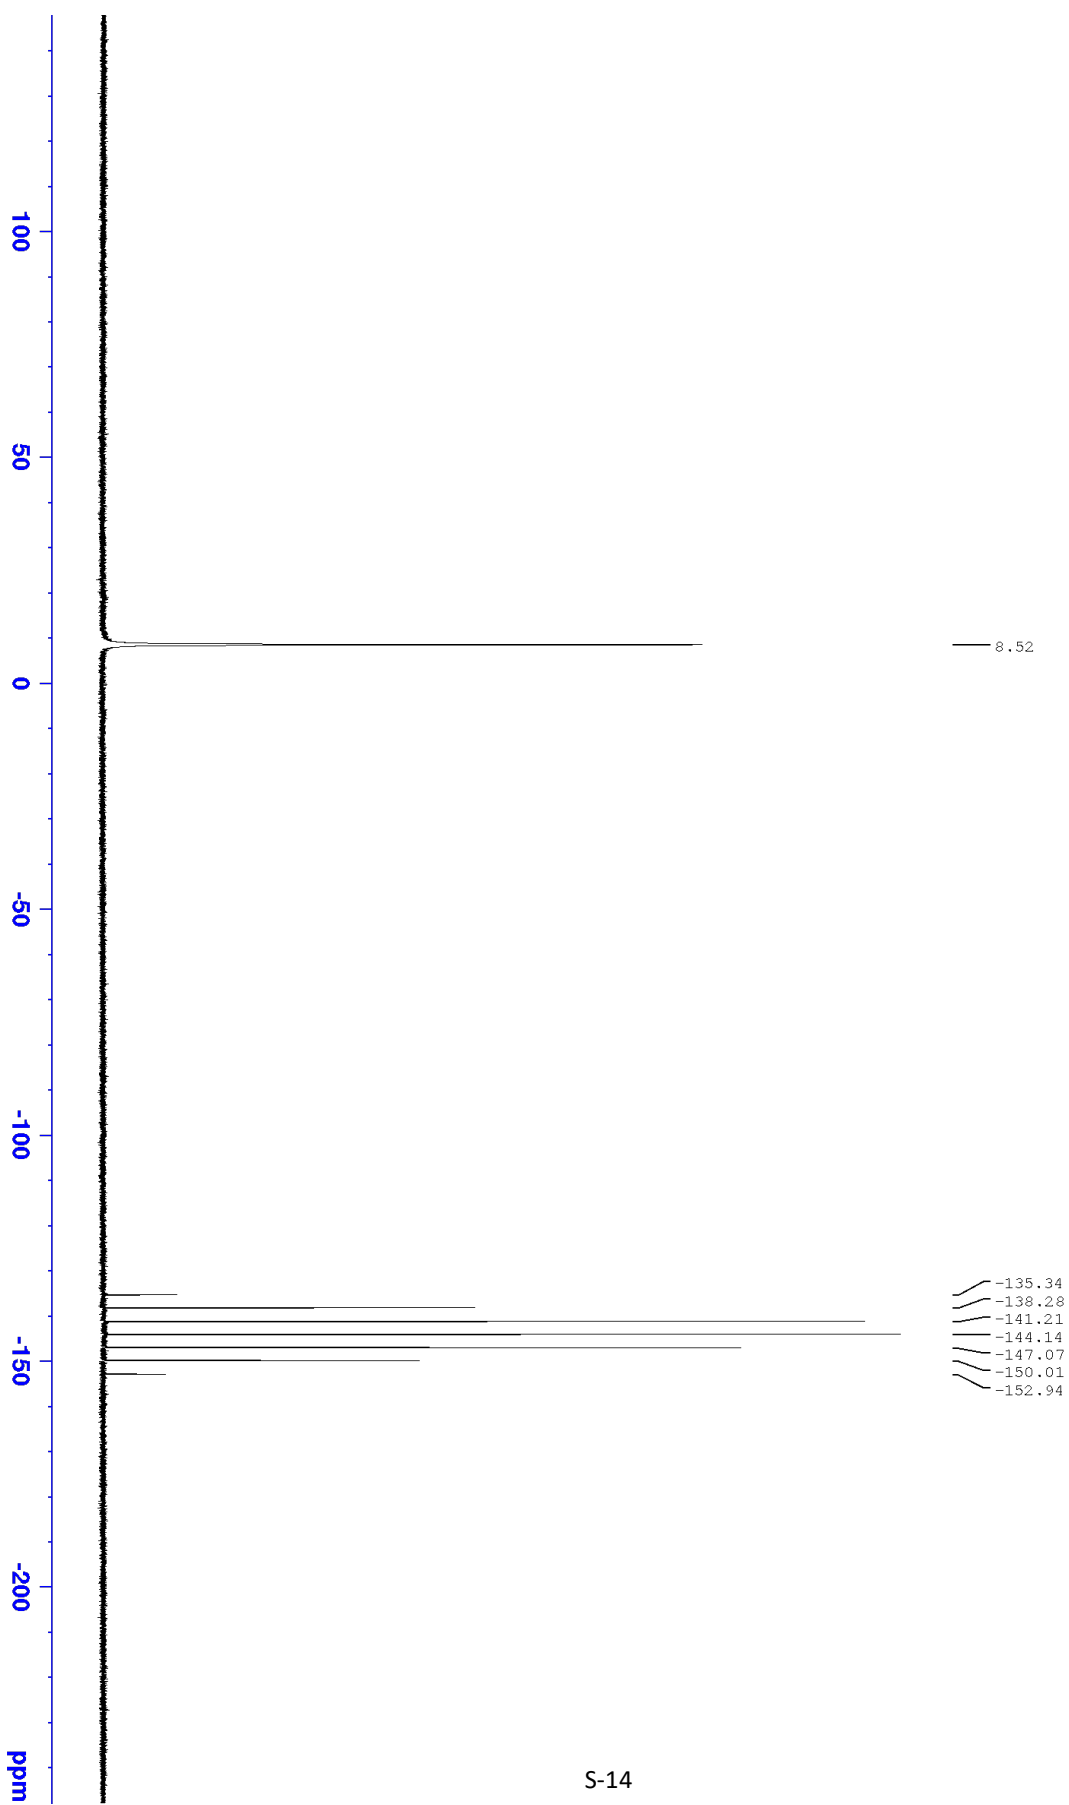

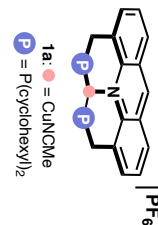

### IR spectrum

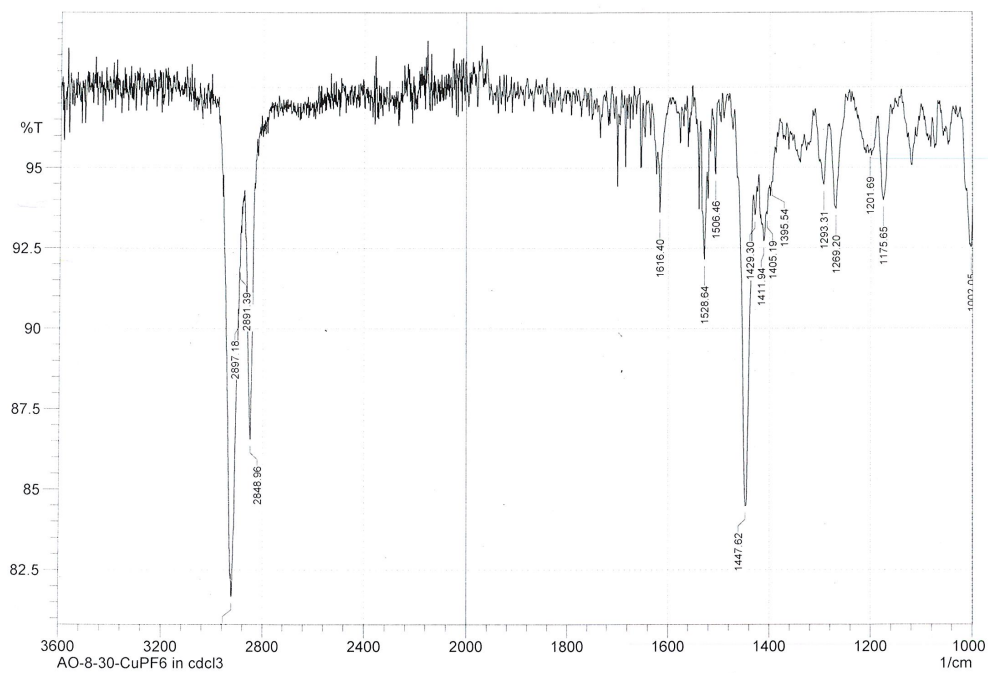

| No. | Peak    | Intensity | Corr. Intensity | Base (H) | Base (L) | Area  | Corr. Area |
|-----|---------|-----------|-----------------|----------|----------|-------|------------|
| 1   | 1002.05 | 92.529    | 1.371           | 1009.77  | 999.16   | 0.332 | 0.047      |
| 2   | 1175.65 | 93.975    | 2.744           | 1185.3   | 1162.15  | 0.496 | 0.164      |
| 3   | 1201.69 | 95.531    | 0.038           | 1202.66  | 1200.73  | 0.038 | 0          |
| 4   | 1269.2  | 93.711    | 2.987           | 1281.74  | 1250.88  | 0.633 | 0.197      |
| 5   | 1293.31 | 94.467    | 1.254           | 1300.07  | 1285.6   | 0.311 | 0.041      |
| 6   | 1395.54 | 94.535    | 0.181           | 1396.51  | 1389.76  | 0.147 | 0.003      |
| 7   | 1405.19 | 93.54     | 0.23            | 1406.15  | 1401.33  | 0.129 | 0.002      |
| 8   | 1411.94 | 92.708    | 0.612           | 1413.87  | 1407.12  | 0.211 | 0.011      |
| 9   | 1429.3  | 93.519    | 0.675           | 1431.23  | 1425.44  | 0.159 | 0.011      |
| 10  | 1447.62 | 84.472    | 9.945           | 1462.09  | 1432.19  | 1.424 | 0.676      |
| 11  | 1506.46 | 94.796    | 1.978           | 1510.31  | 1503.56  | 0.123 | 0.027      |
| 12  | 1528.64 | 92.146    | 1.874           | 1531.53  | 1523.82  | 0.233 | 0.035      |
| 13  | 1616.4  | 93.605    | 2.167           | 1620.26  | 1603.86  | 0.333 | 0.052      |
| 14  | 2848.96 | 86.56     | 7.887           | 2874.03  | 2833.52  | 1.769 | 0.759      |
| 15  | 2891.39 | 91.896    | 0.294           | 2892.36  | 2888.5   | 0.129 | 0.001      |
| 16  | 2897.18 | 90.453    | 0.406           | 2898.14  | 2893.32  | 0.196 | 0.007      |
| 17  | 2923.22 | 81.674    | 1.548           | 2926.11  | 2902     | 1.722 | 0.137      |

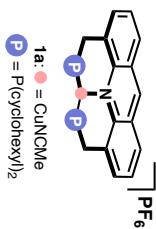

D:\2023\_Chemistry\AO-8-30C

03/02/23 09:38:07

### HRESIMS experiment

C39H55OINP2: C9 H95 Cu1 Ni1 P2 pa.Chng 1

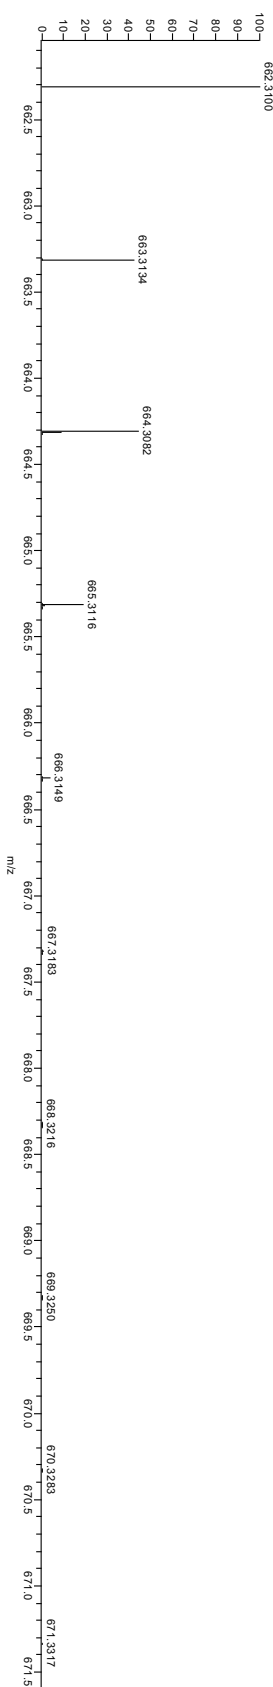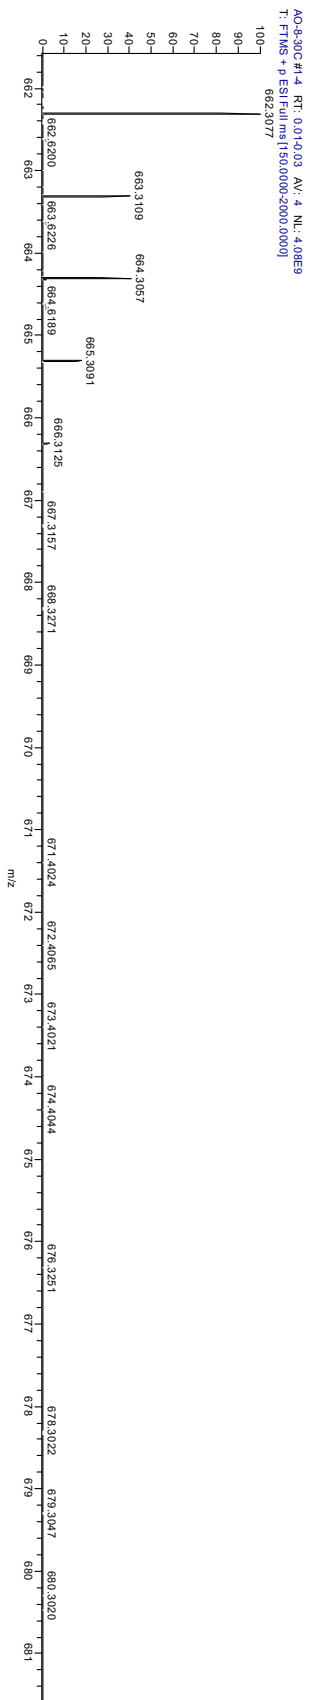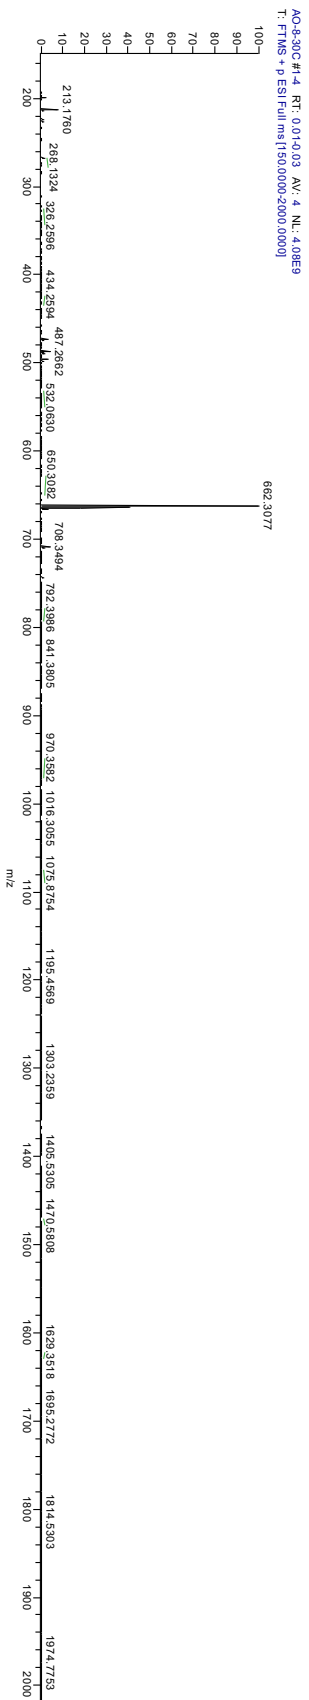



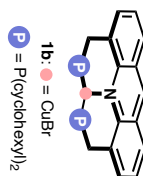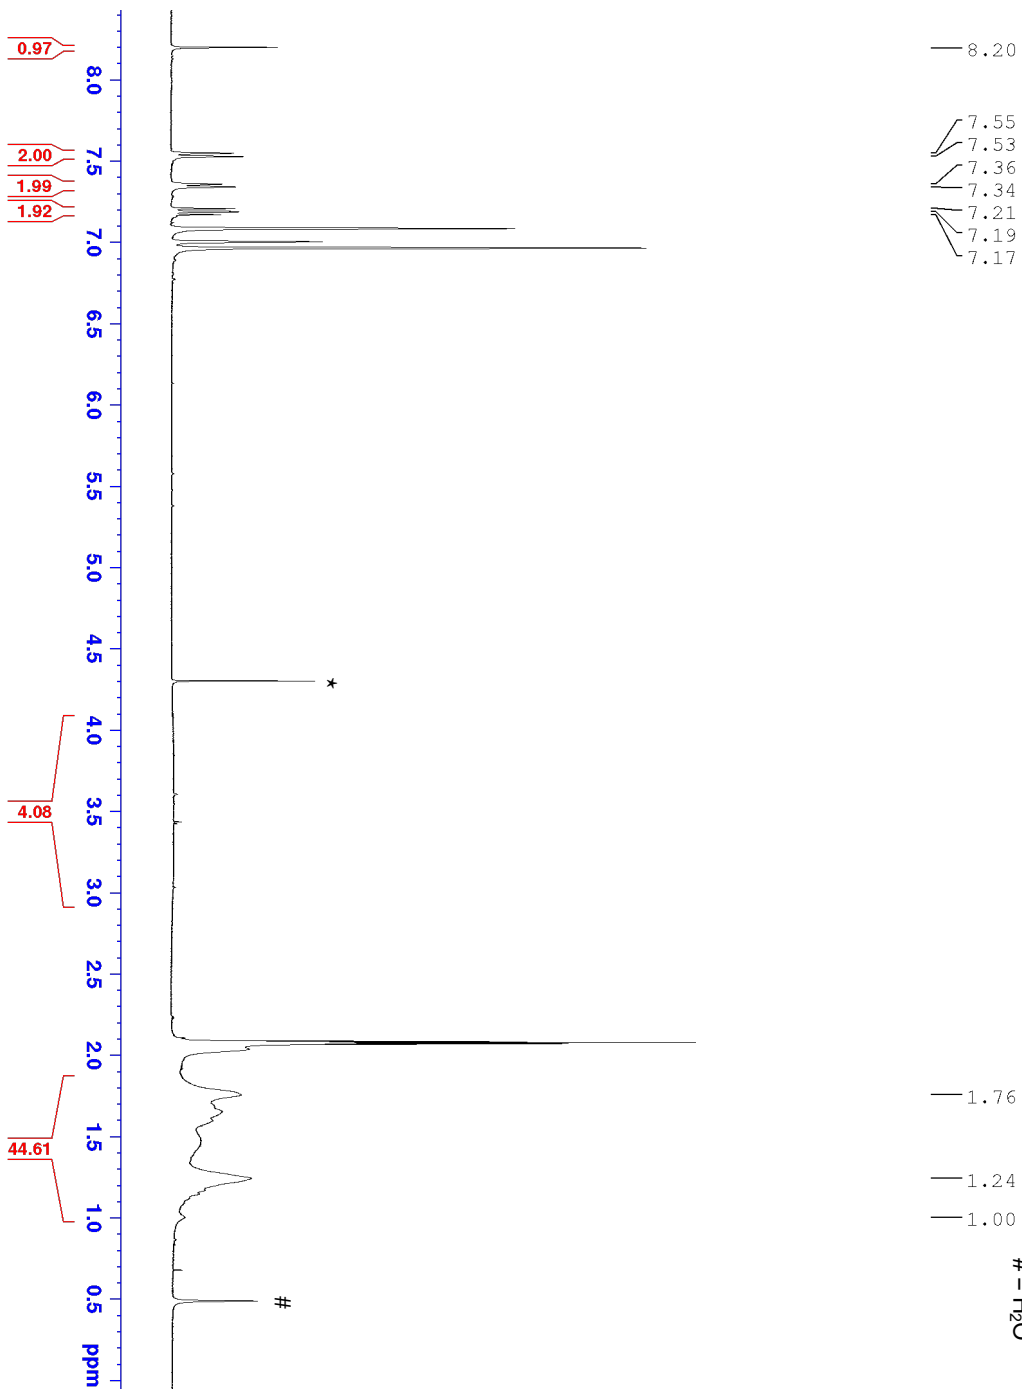

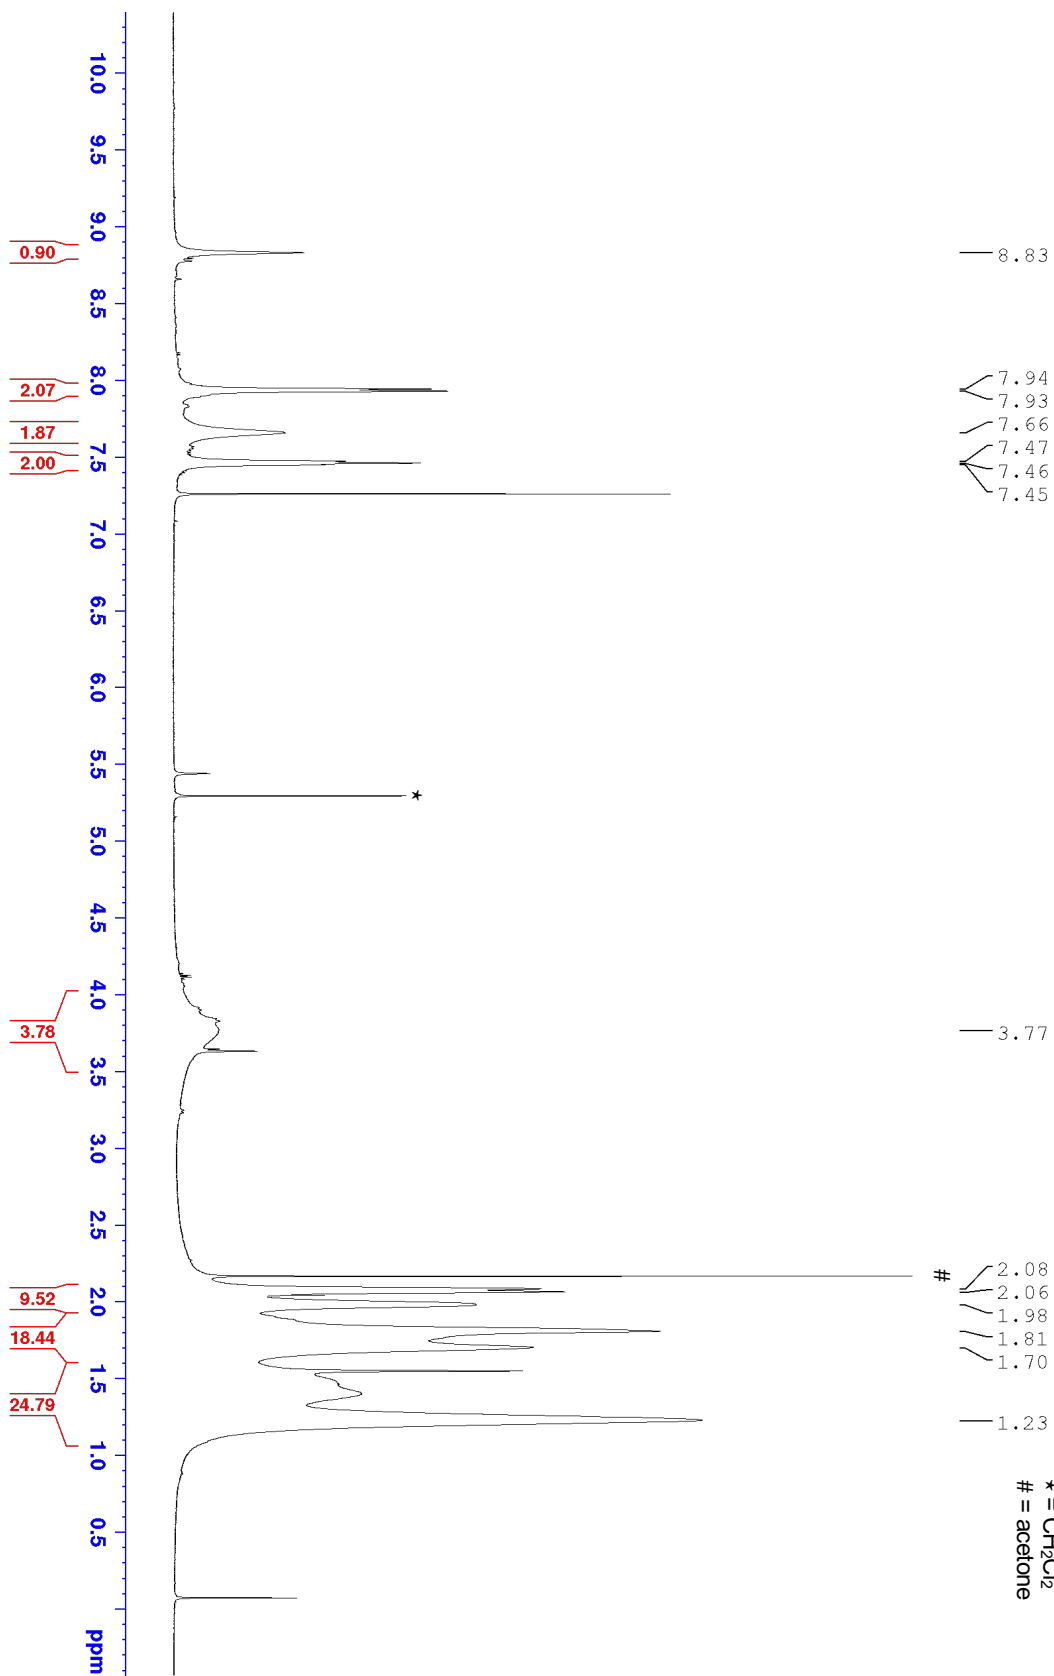

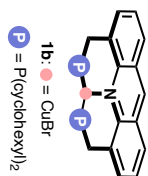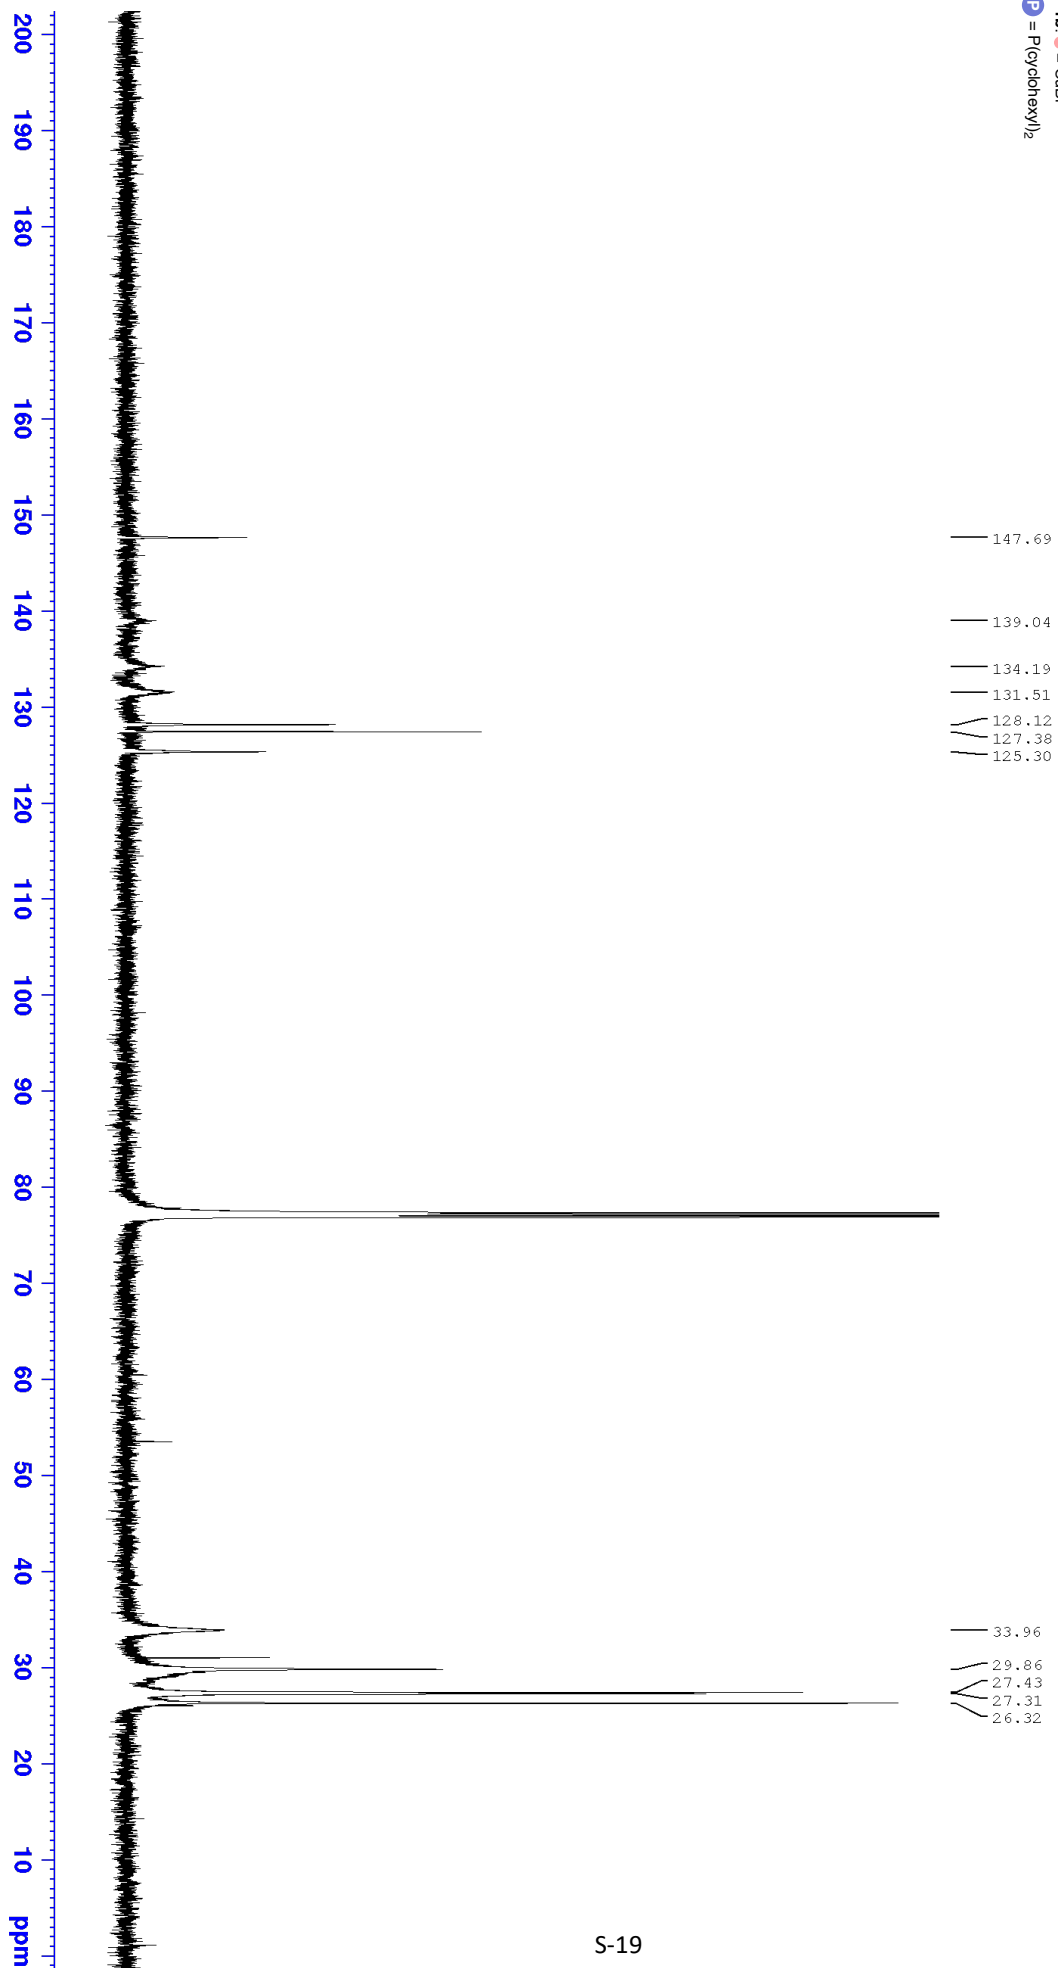

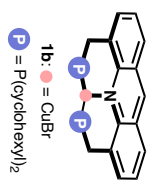

<sup>31</sup>P NMR experiment performed at 25 °C in CDCl<sub>3</sub>

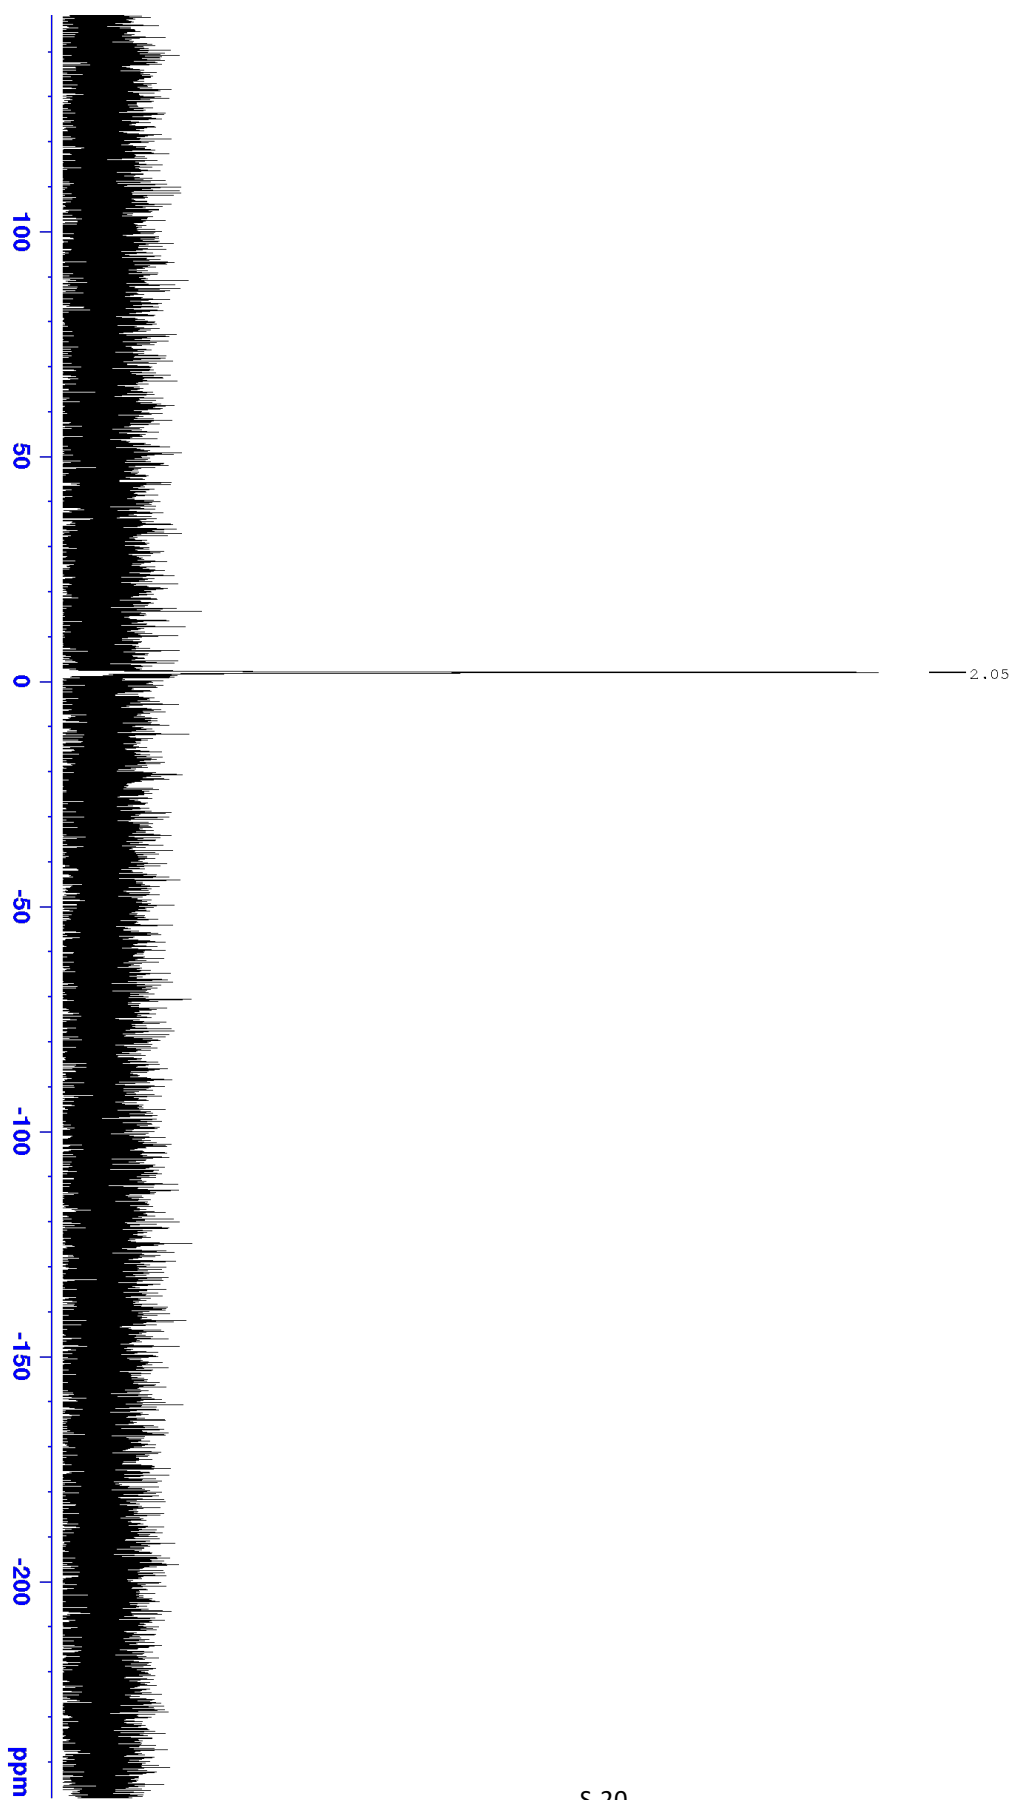

# IR spectrum

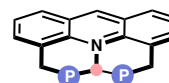

1b: ● = CuBr

● = P(cyclohexyl)<sub>2</sub>

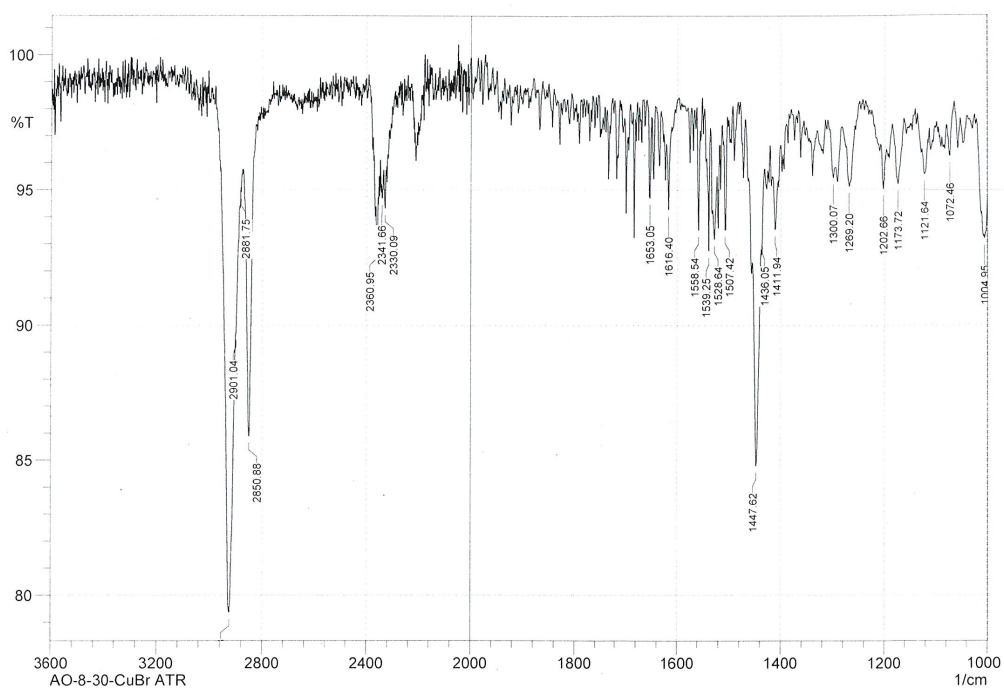

| No. | Peak    | Intensity | Corr. Intensity | Base (H) | Base (L) | Area  | Corr. Area |
|-----|---------|-----------|-----------------|----------|----------|-------|------------|
| 1   | 1004.95 | 93.196    | 0.31            | 1005.91  | 999.16   | 0.19  | 0.011      |
| 2   | 1072.46 | 96.242    | 1.522           | 1079.21  | 1063.78  | 0.189 | 0.041      |
| 3   | 1121.64 | 95.566    | 1.075           | 1126.47  | 1114.89  | 0.204 | 0.034      |
| 4   | 1173.72 | 95.207    | 2.316           | 1185.3   | 1162.15  | 0.376 | 0.124      |
| 5   | 1202.66 | 95.035    | 1.556           | 1208.44  | 1196.87  | 0.209 | 0.035      |
| 6   | 1269.2  | 95.128    | 1.763           | 1274.99  | 1258.59  | 0.295 | 0.078      |
| 7   | 1300.07 | 95.45     | 0.929           | 1310.67  | 1295.24  | 0.247 | 0.023      |
| 8   | 1411.94 | 93.527    | 1.827           | 1415.8   | 1407.12  | 0.218 | 0.037      |
| 9   | 1436.05 | 92.606    | 0.631           | 1437.02  | 1432.19  | 0.113 | 0          |
| 10  | 1447.62 | 84.787    | 7.583           | 1454.38  | 1438.94  | 0.834 | 0.304      |
| 11  | 1507.42 | 93.511    | 3.608           | 1510.31  | 1503.56  | 0.14  | 0.059      |
| 12  | 1528.64 | 93.176    | 1.549           | 1531.53  | 1523.82  | 0.204 | 0.03       |
| 13  | 1539.25 | 92.753    | 4.058           | 1543.1   | 1536.35  | 0.141 | 0.046      |
| 14  | 1558.54 | 93.506    | 4.06            | 1562.39  | 1555.64  | 0.131 | 0.058      |
| 15  | 1616.4  | 94.263    | 2.622           | 1620.26  | 1611.58  | 0.157 | 0.04       |
| 16  | 1653.05 | 94.702    | 3.214           | 1658.84  | 1650.16  | 0.125 | 0.048      |
| 17  | 2330.09 | 94.316    | 1.219           | 2334.91  | 2328.16  | 0.154 | 0.02       |
| 18  | 2341.66 | 94.688    | 0.588           | 2342.62  | 2335.87  | 0.145 | 0.01       |
| 19  | 2360.95 | 92.964    | 1.569           | 2364.81  | 2356.13  | 0.253 | 0.042      |
| 20  | 2850.88 | 85.884    | 10.659          | 2874.03  | 2825.81  | 1.709 | 0.983      |
| 21  | 2881.75 | 94.916    | 0.303           | 2882.71  | 2877.89  | 0.098 | 0.002      |
| 22  | 2901.04 | 89.667    | 0.316           | 2902     | 2887.53  | 0.507 | 0.004      |
| 23  | 2924.18 | 79.363    | 12.601          | 2957.94  | 2902.96  | 3.625 | 1.776      |

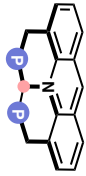

1b: ● = OMe

● = P(cyclohexyl)<sub>2</sub>

D:\2023\_Chemistry\AO-8-30B

03/02/23 09:35:13

### HRESIMS experiment

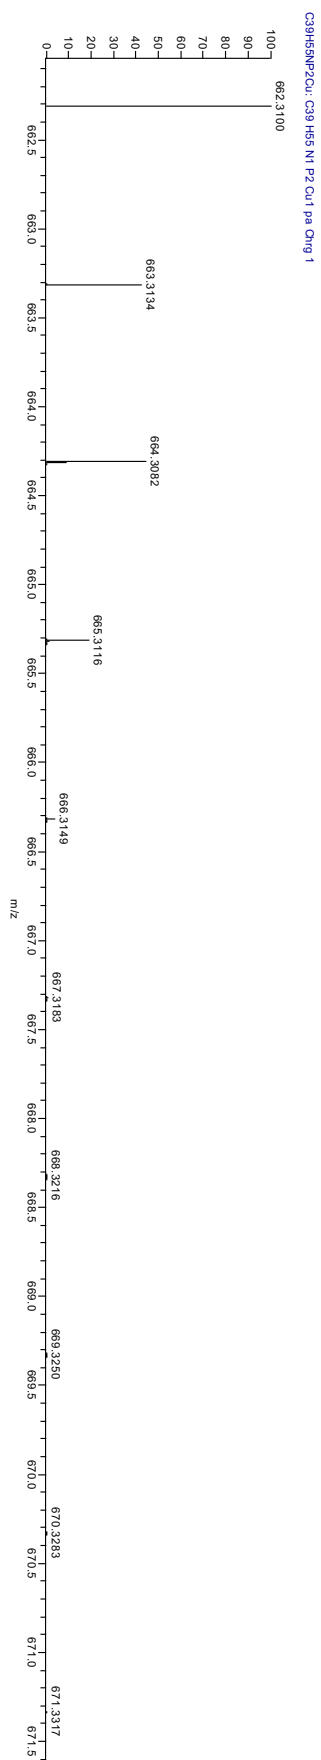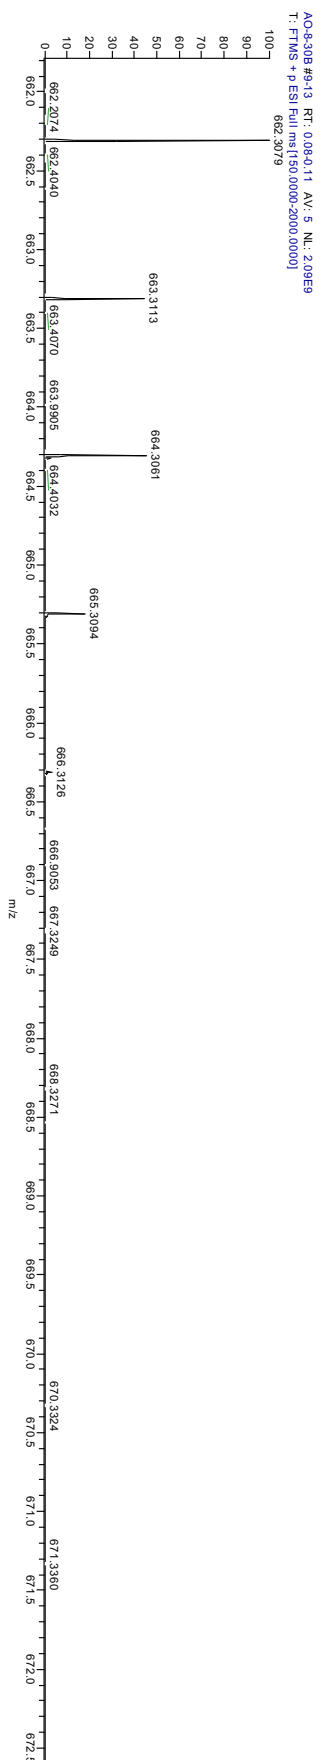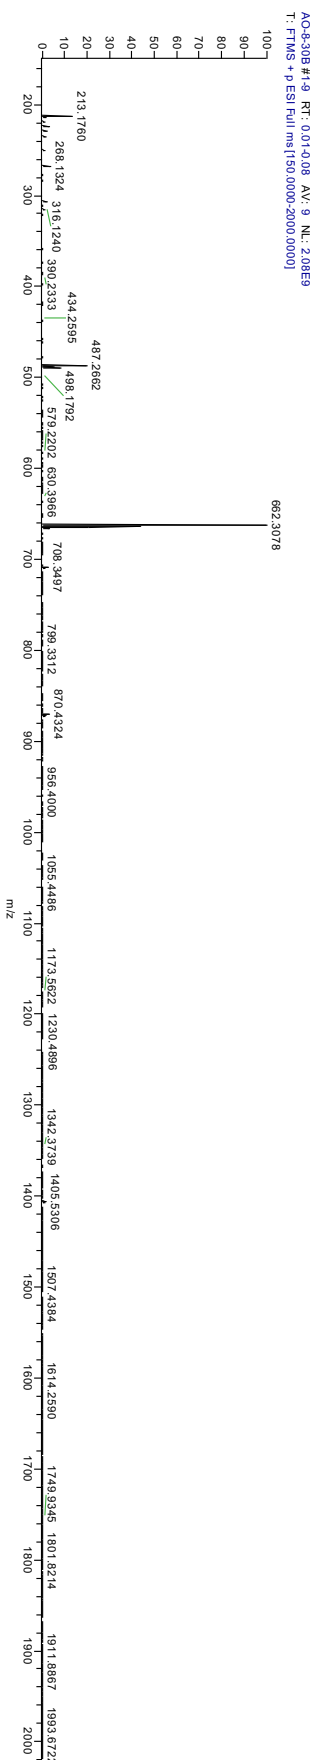

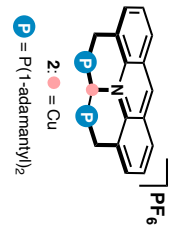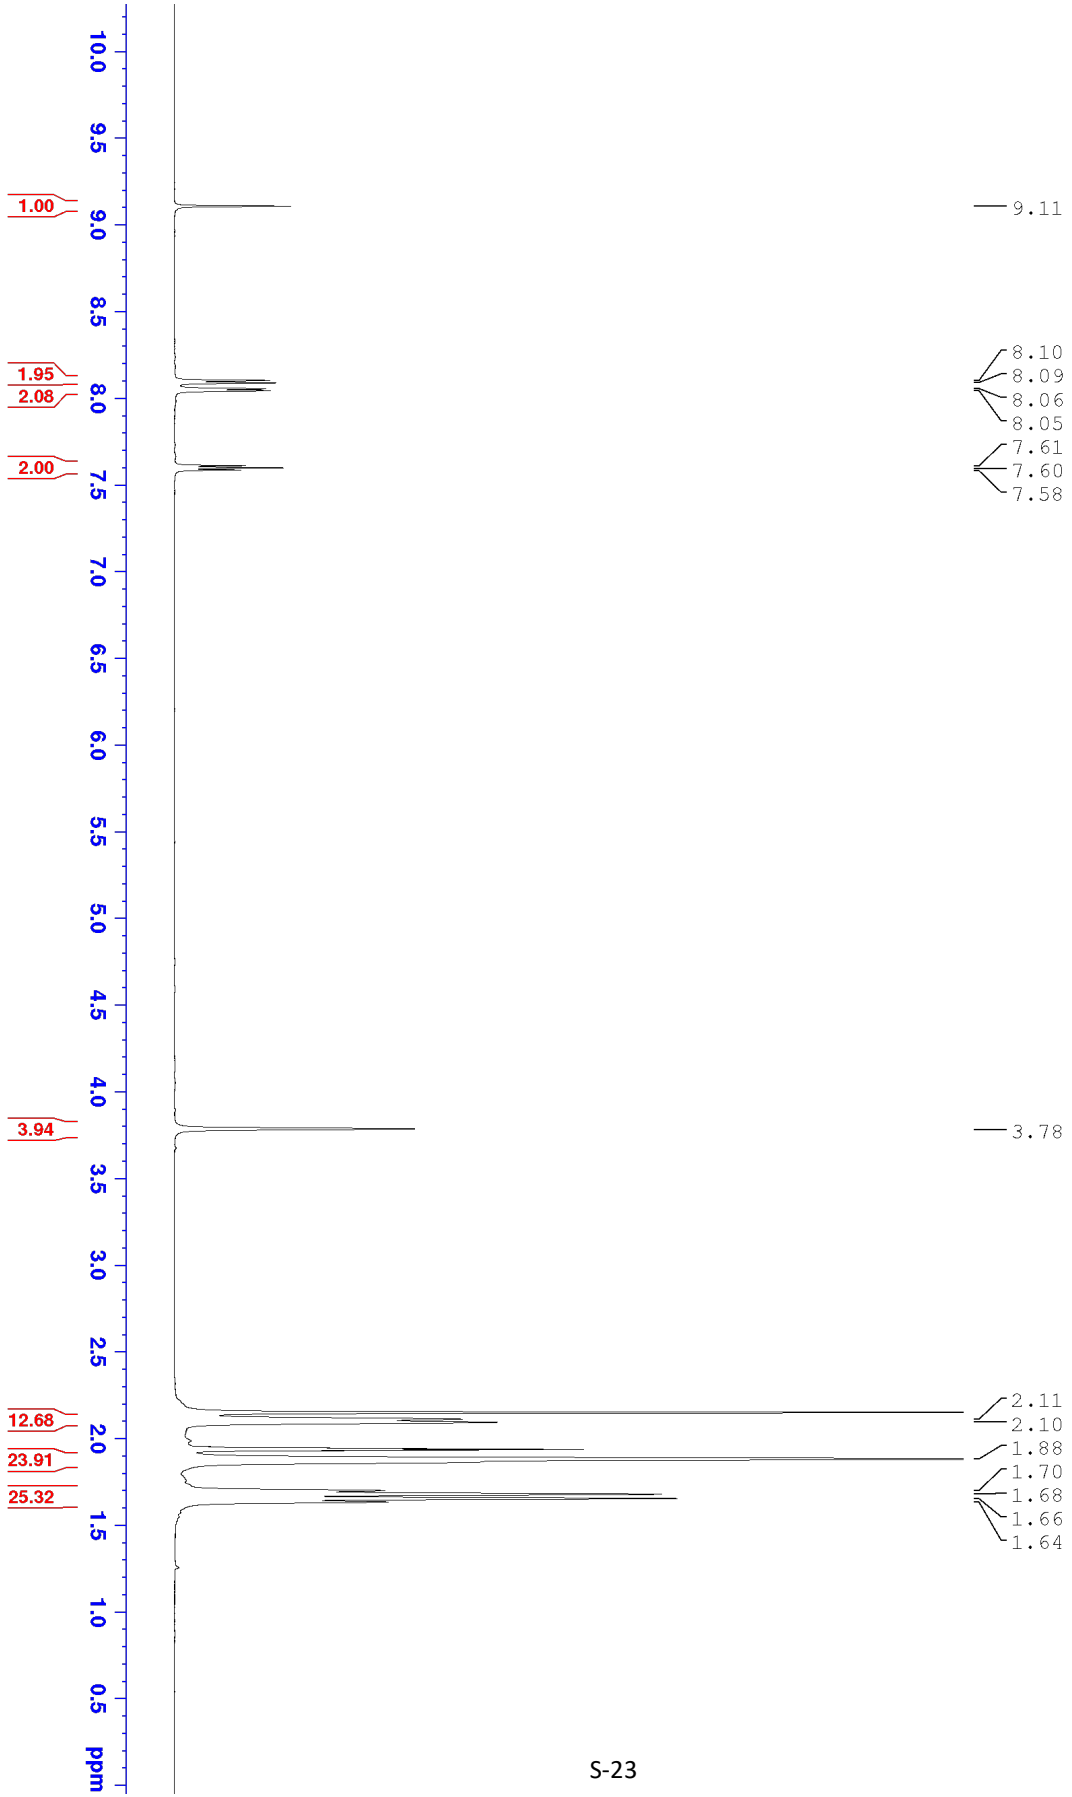

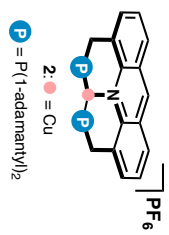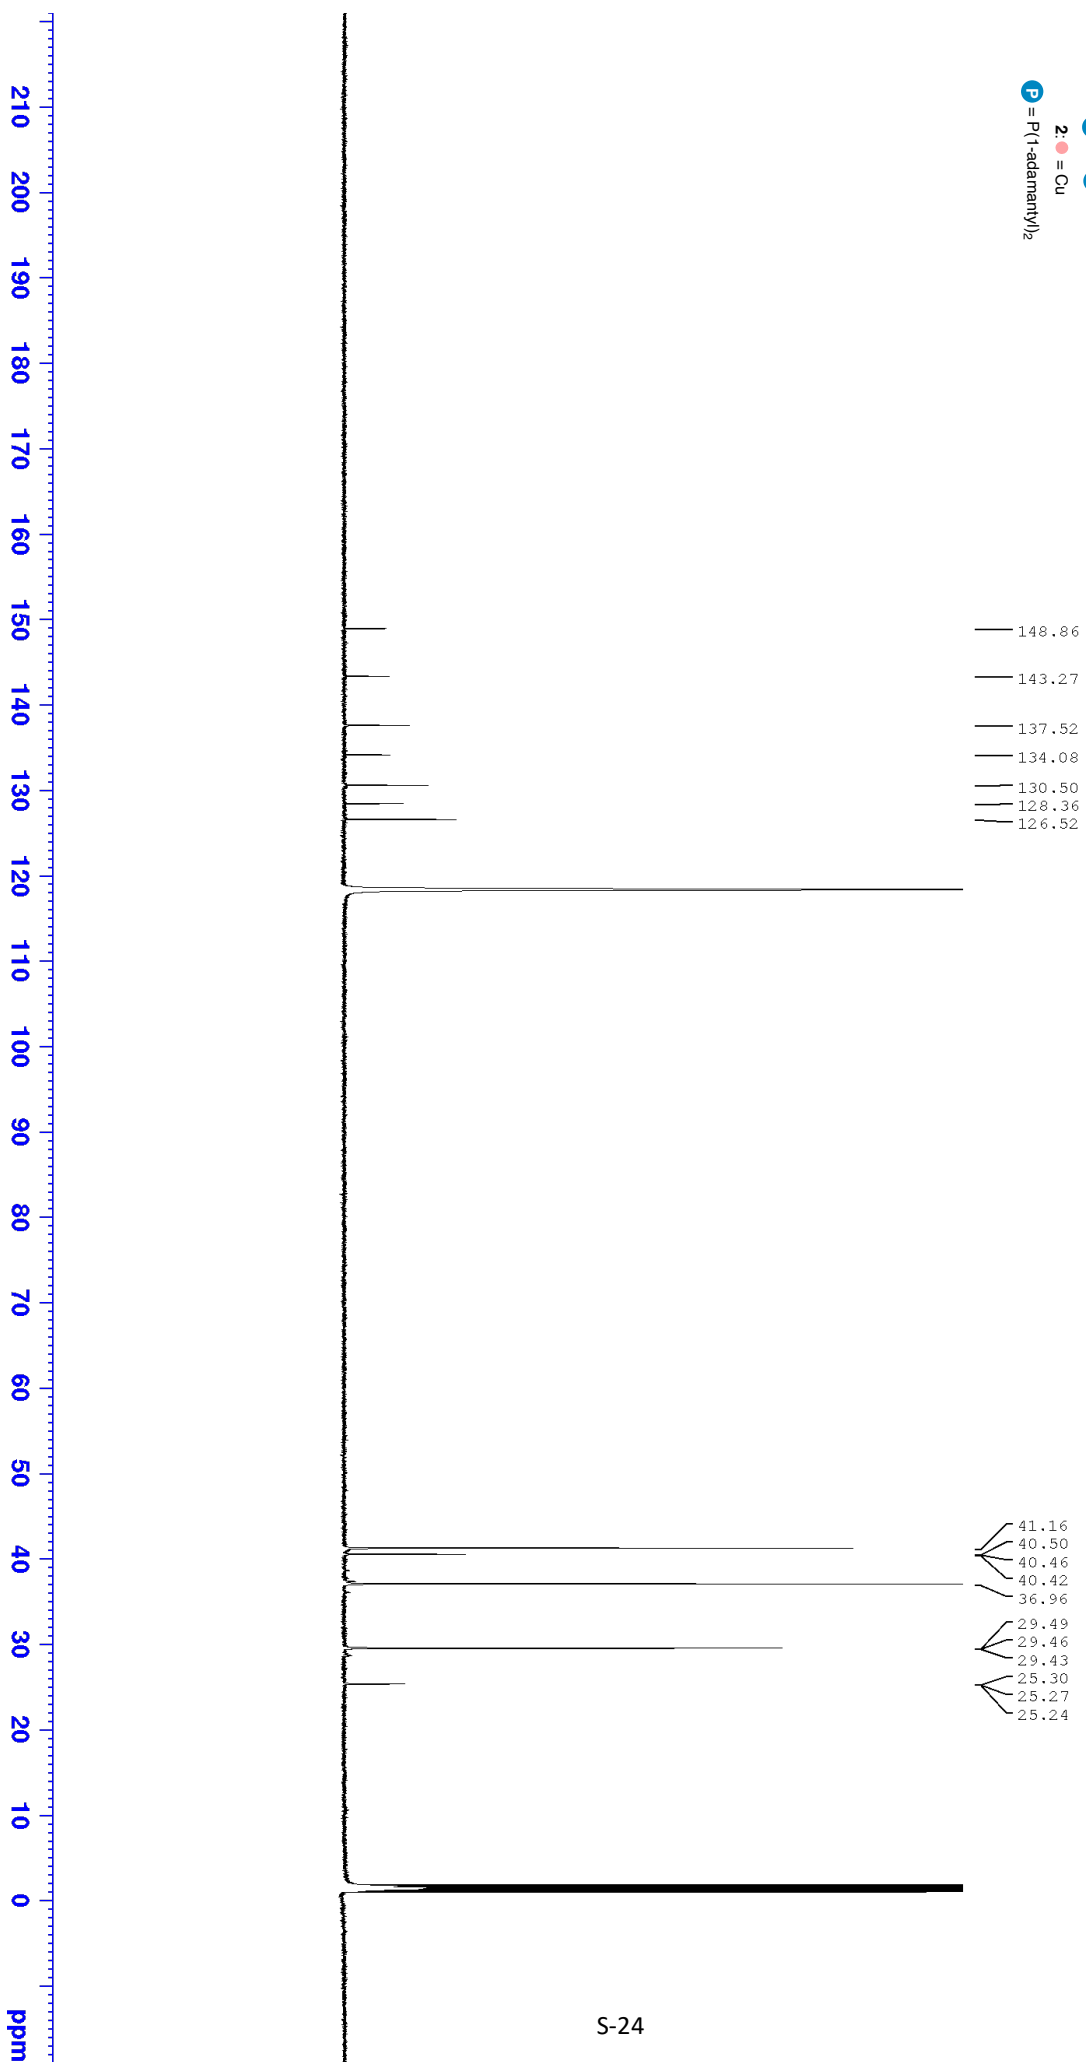





$^{31}\text{P}$  NMR experiment performed at 25 °C in  $\text{CDCl}_3$

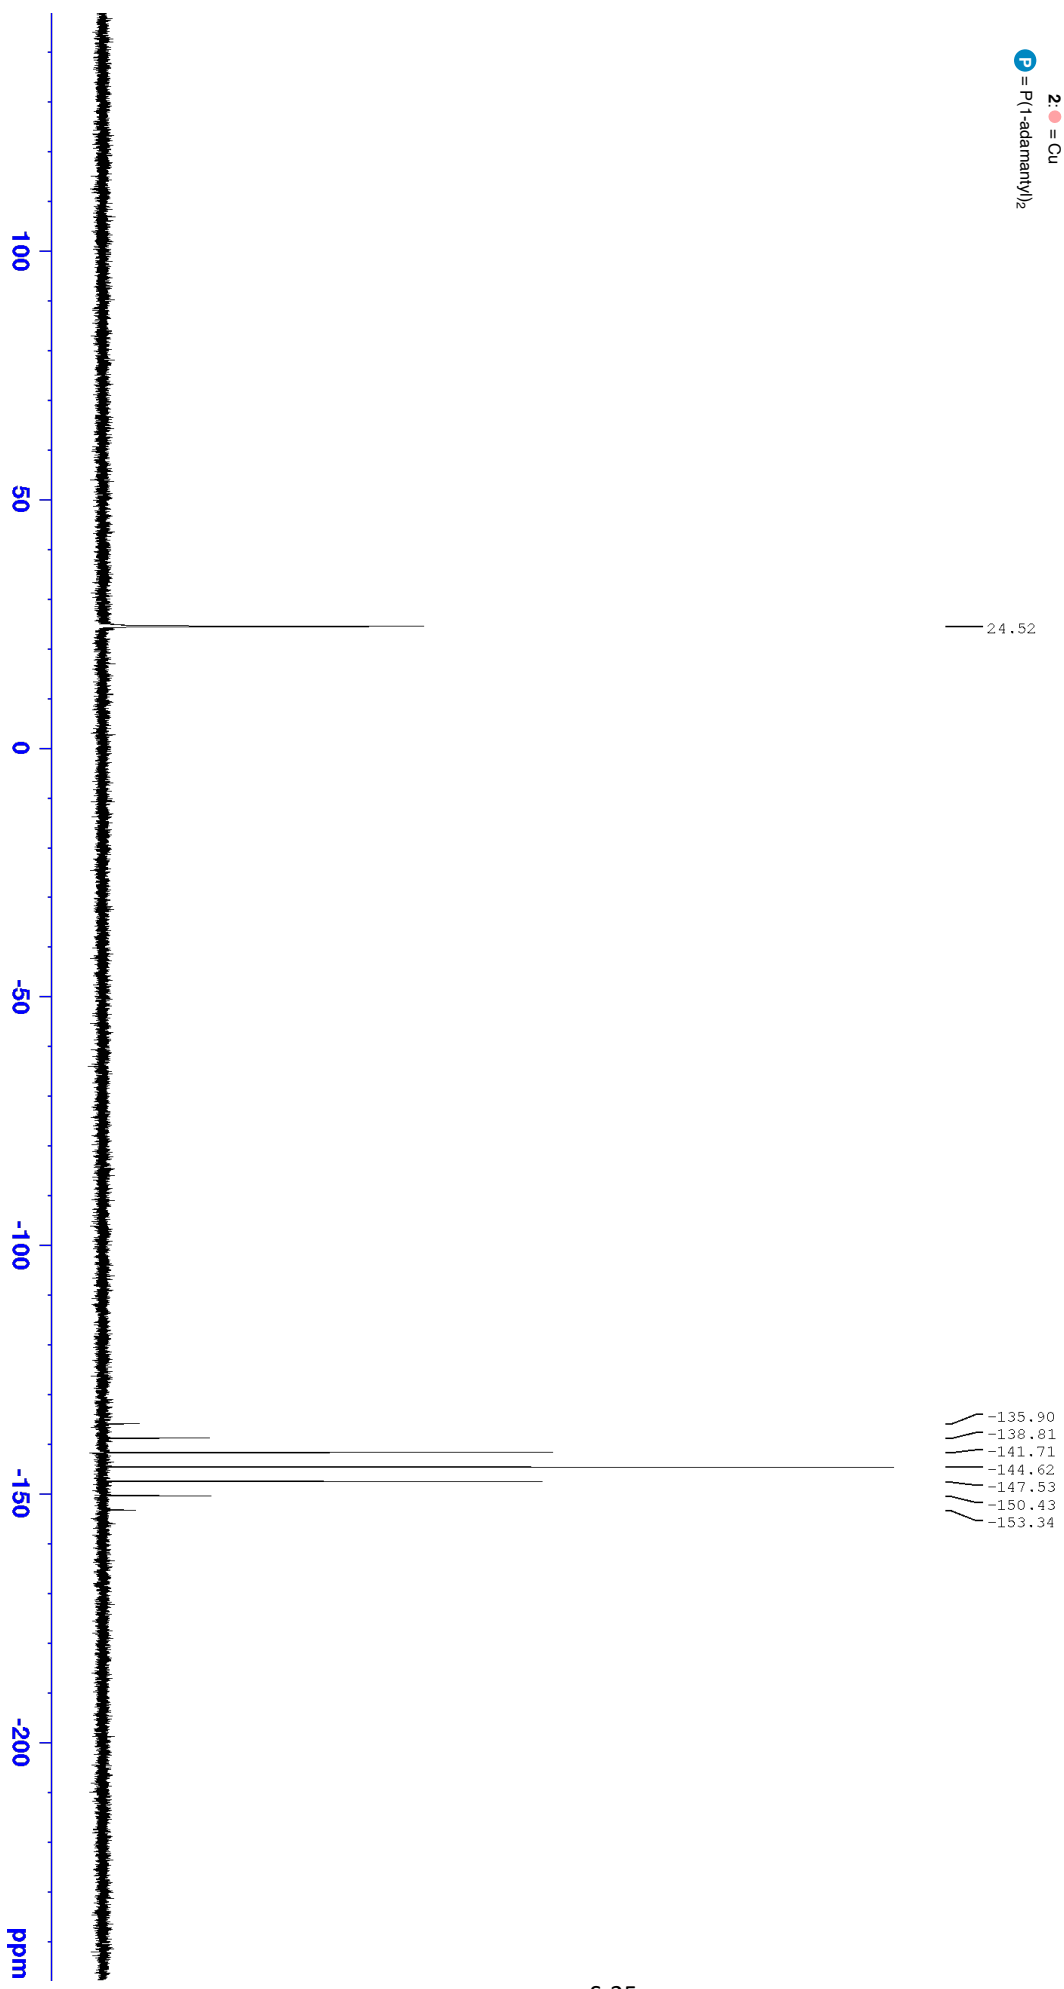

# IR spectrum

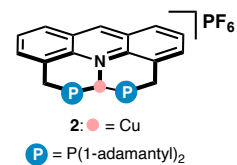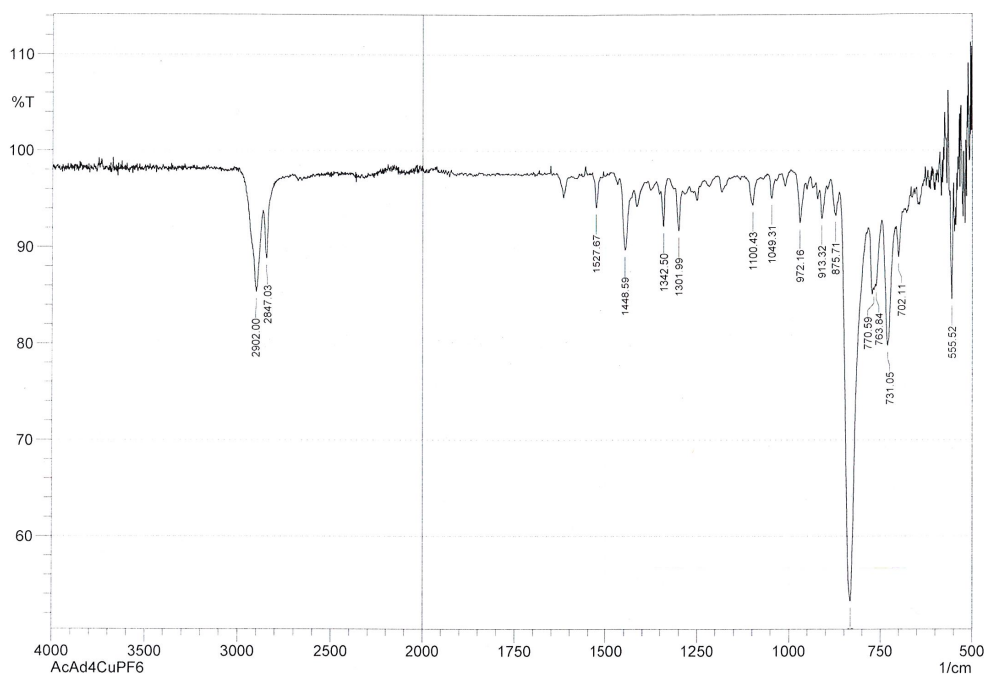

| No. | Peak    | Intensity | Corr. Intensity | Base (H) | Base (L) | Area  | Corr. Area |
|-----|---------|-----------|-----------------|----------|----------|-------|------------|
| 1   | 555.52  | 84.572    | 11.354          | 560.34   | 551.66   | 0.419 | 0.262      |
| 2   | 702.11  | 88.959    | 3.734           | 707.9    | 692.47   | 0.626 | 0.135      |
| 3   | 731.05  | 79.788    | 12.572          | 747.44   | 711.76   | 2.279 | 1.04       |
| 4   | 763.84  | 85.943    | 0.941           | 765.77   | 748.41   | 0.823 | 0.016      |
| 5   | 770.59  | 85.546    | 0.359           | 772.52   | 766.73   | 0.385 | 0.006      |
| 6   | 833.28  | 53.285    | 40.572          | 865.1    | 791.81   | 9.229 | 7.102      |
| 7   | 875.71  | 93.299    | 1.978           | 890.18   | 870.89   | 0.436 | 0.082      |
| 8   | 913.32  | 92.941    | 3.134           | 920.08   | 900.79   | 0.458 | 0.128      |
| 9   | 972.16  | 92.508    | 4.662           | 984.69   | 956.72   | 0.594 | 0.239      |
| 10  | 1049.31 | 95.071    | 2.236           | 1059.92  | 1040.63  | 0.306 | 0.08       |
| 11  | 1100.43 | 94.387    | 2.632           | 1113.93  | 1088.85  | 0.461 | 0.132      |
| 12  | 1301.99 | 91.669    | 4.327           | 1312.6   | 1292.35  | 0.531 | 0.172      |
| 13  | 1342.5  | 92.165    | 4.232           | 1350.22  | 1331.89  | 0.403 | 0.119      |
| 14  | 1448.59 | 89.711    | 6.473           | 1464.98  | 1431.23  | 1.016 | 0.436      |
| 15  | 1527.67 | 94.128    | 3.445           | 1539.25  | 1516.1   | 0.394 | 0.147      |
| 16  | 2847.03 | 88.84     | 5.539           | 2862.46  | 2809.41  | 1.609 | 0.431      |
| 17  | 2902    | 85.348    | 0.894           | 2903.93  | 2867.28  | 1.786 | 0.09       |

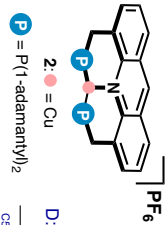

D:\2023\_Chemistry\A0-8-30A

03/02/23 09:32:52

HRESIMS experiment

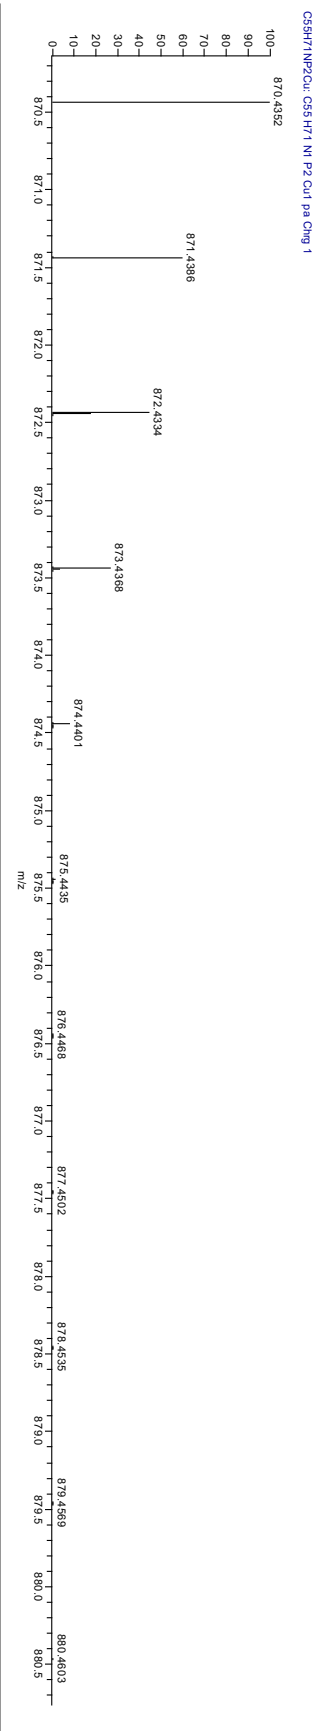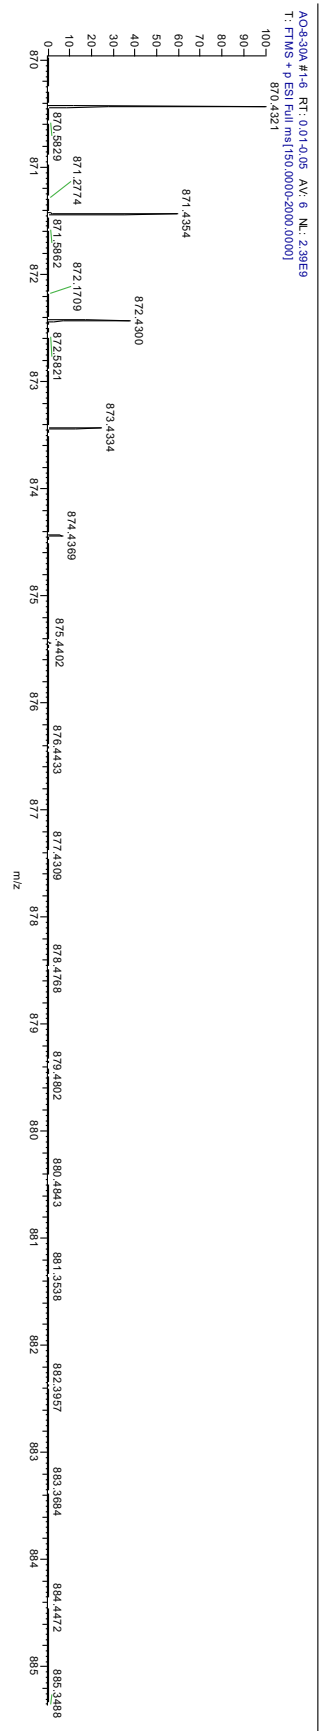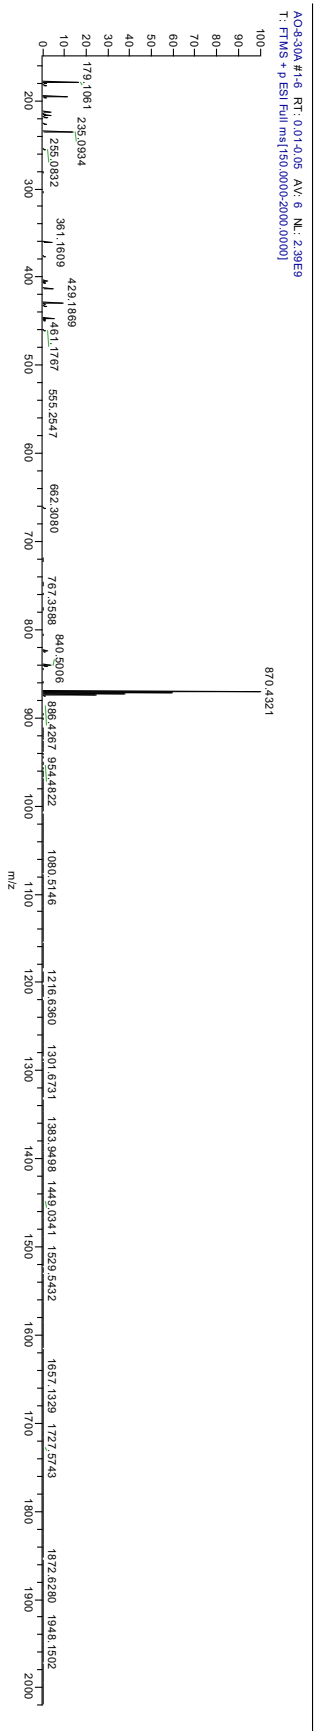

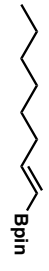

<sup>1</sup>H NMR experiment performed at 25 °C in CDCl<sub>3</sub>

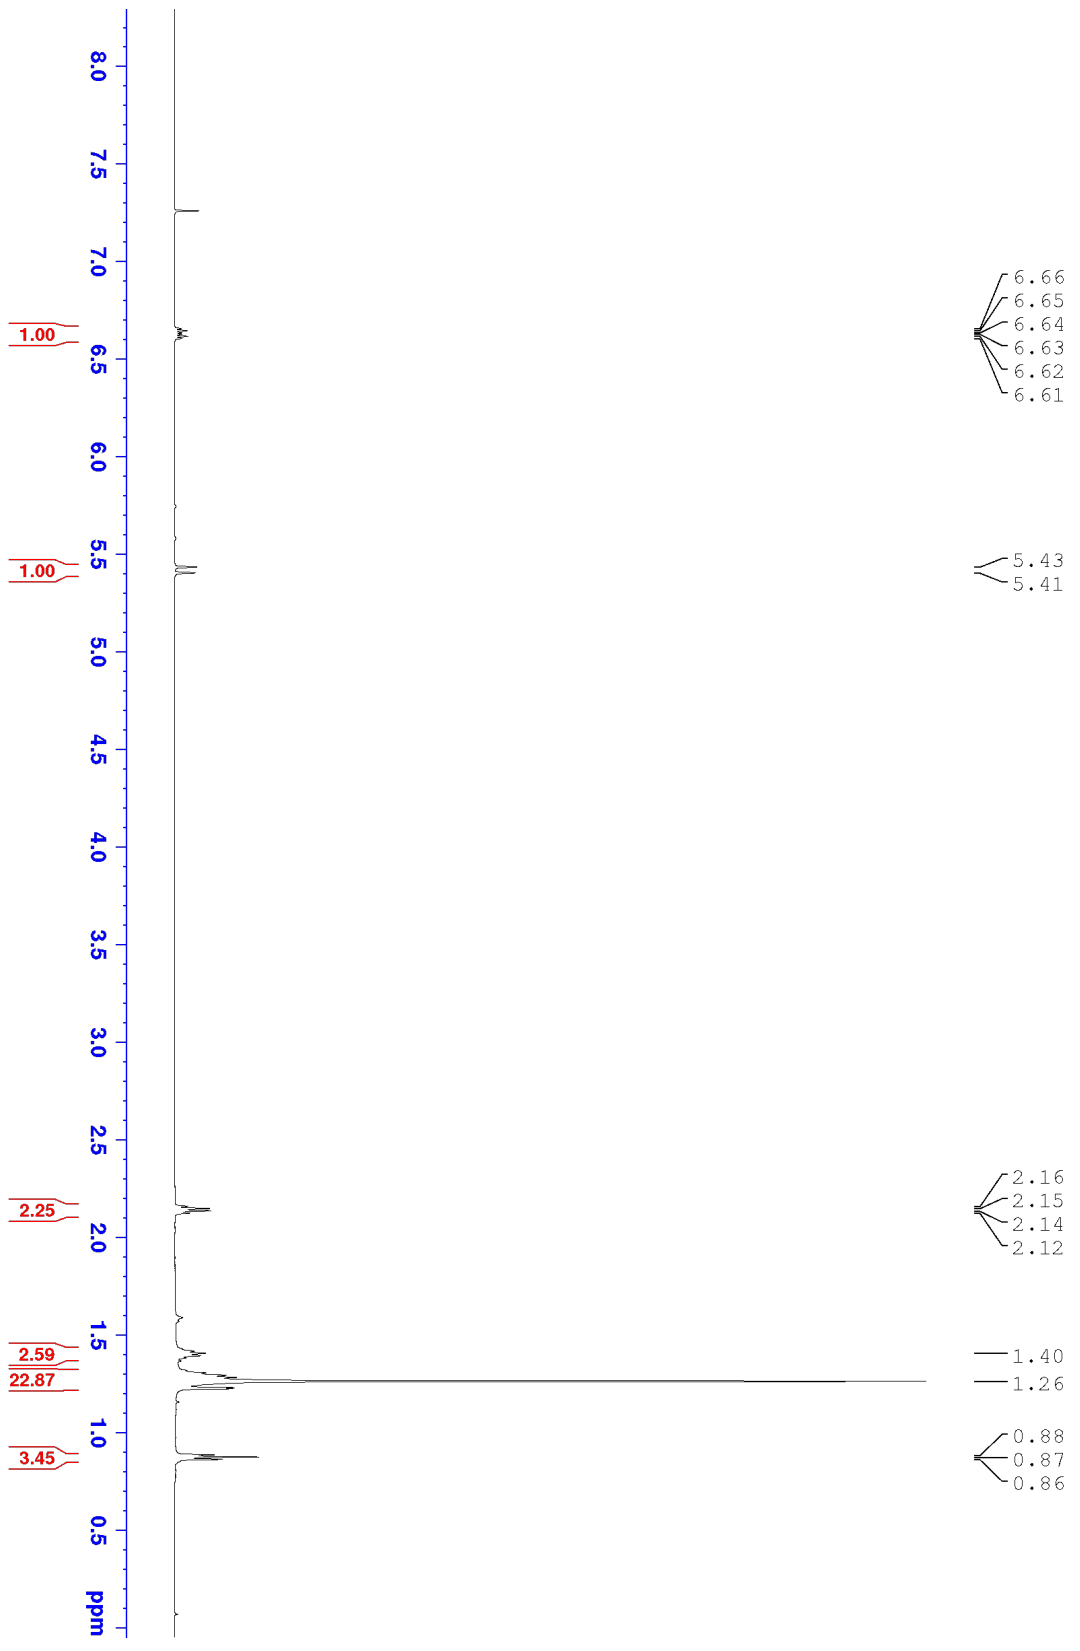

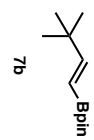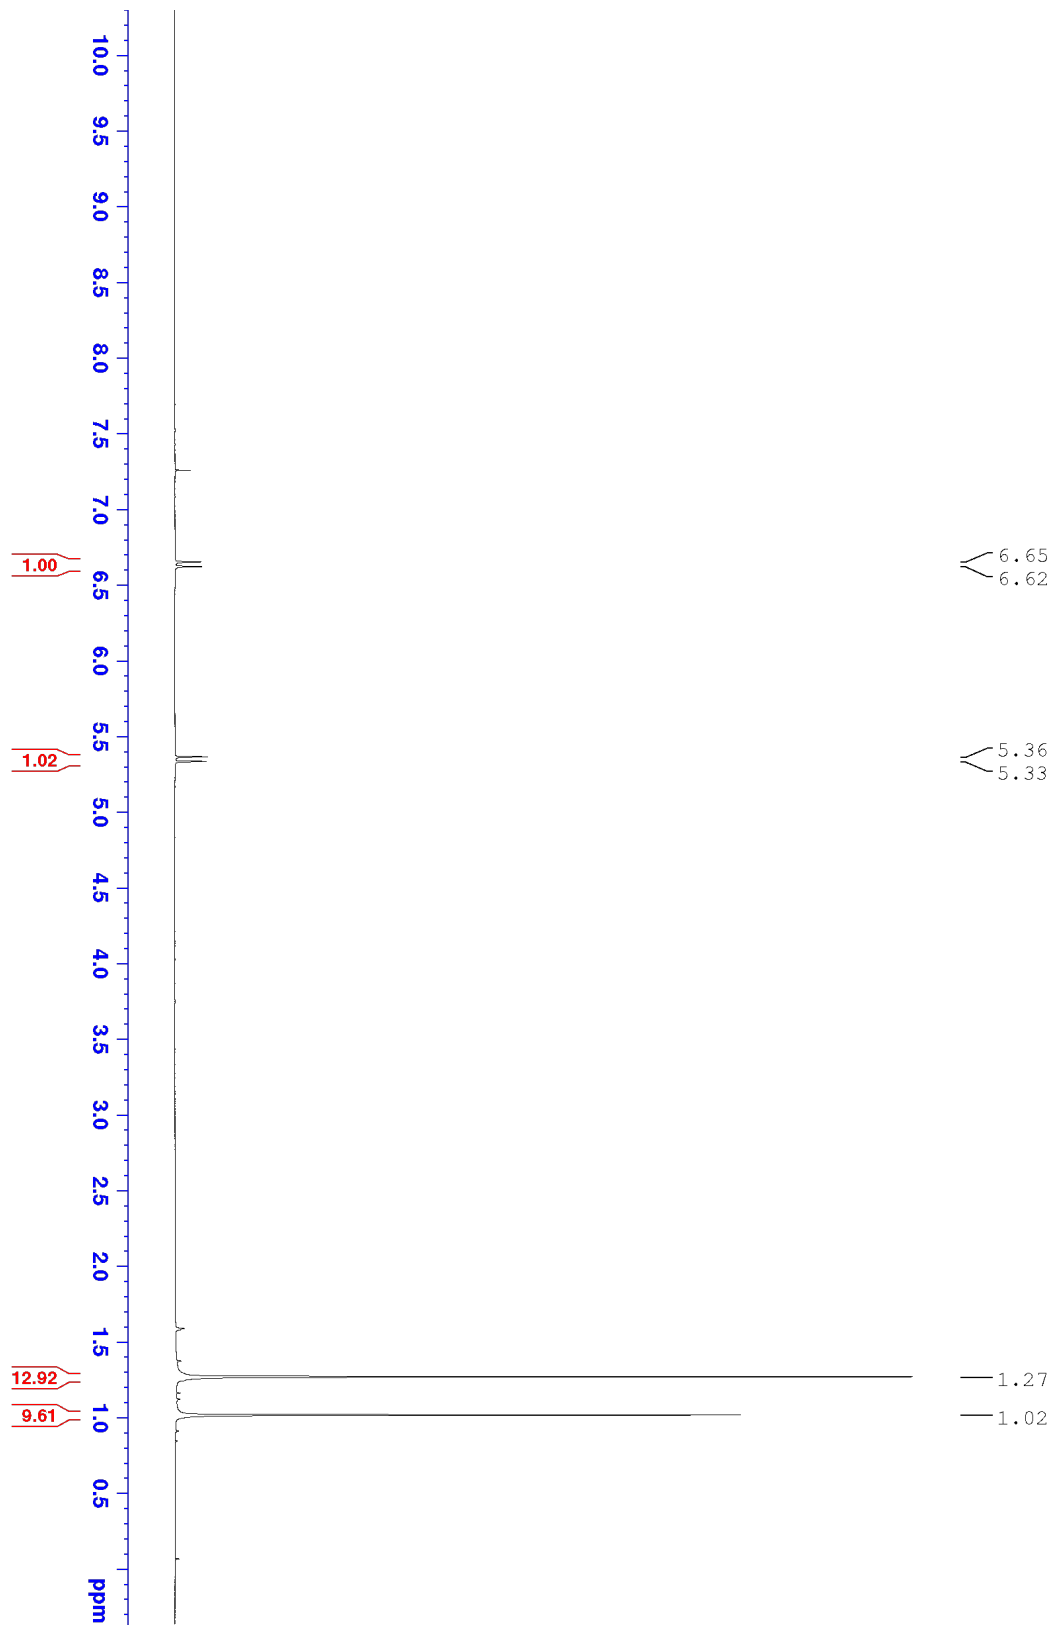

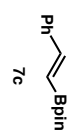

<sup>1</sup>H NMR experiment performed at 25 °C in CDCl<sub>3</sub>

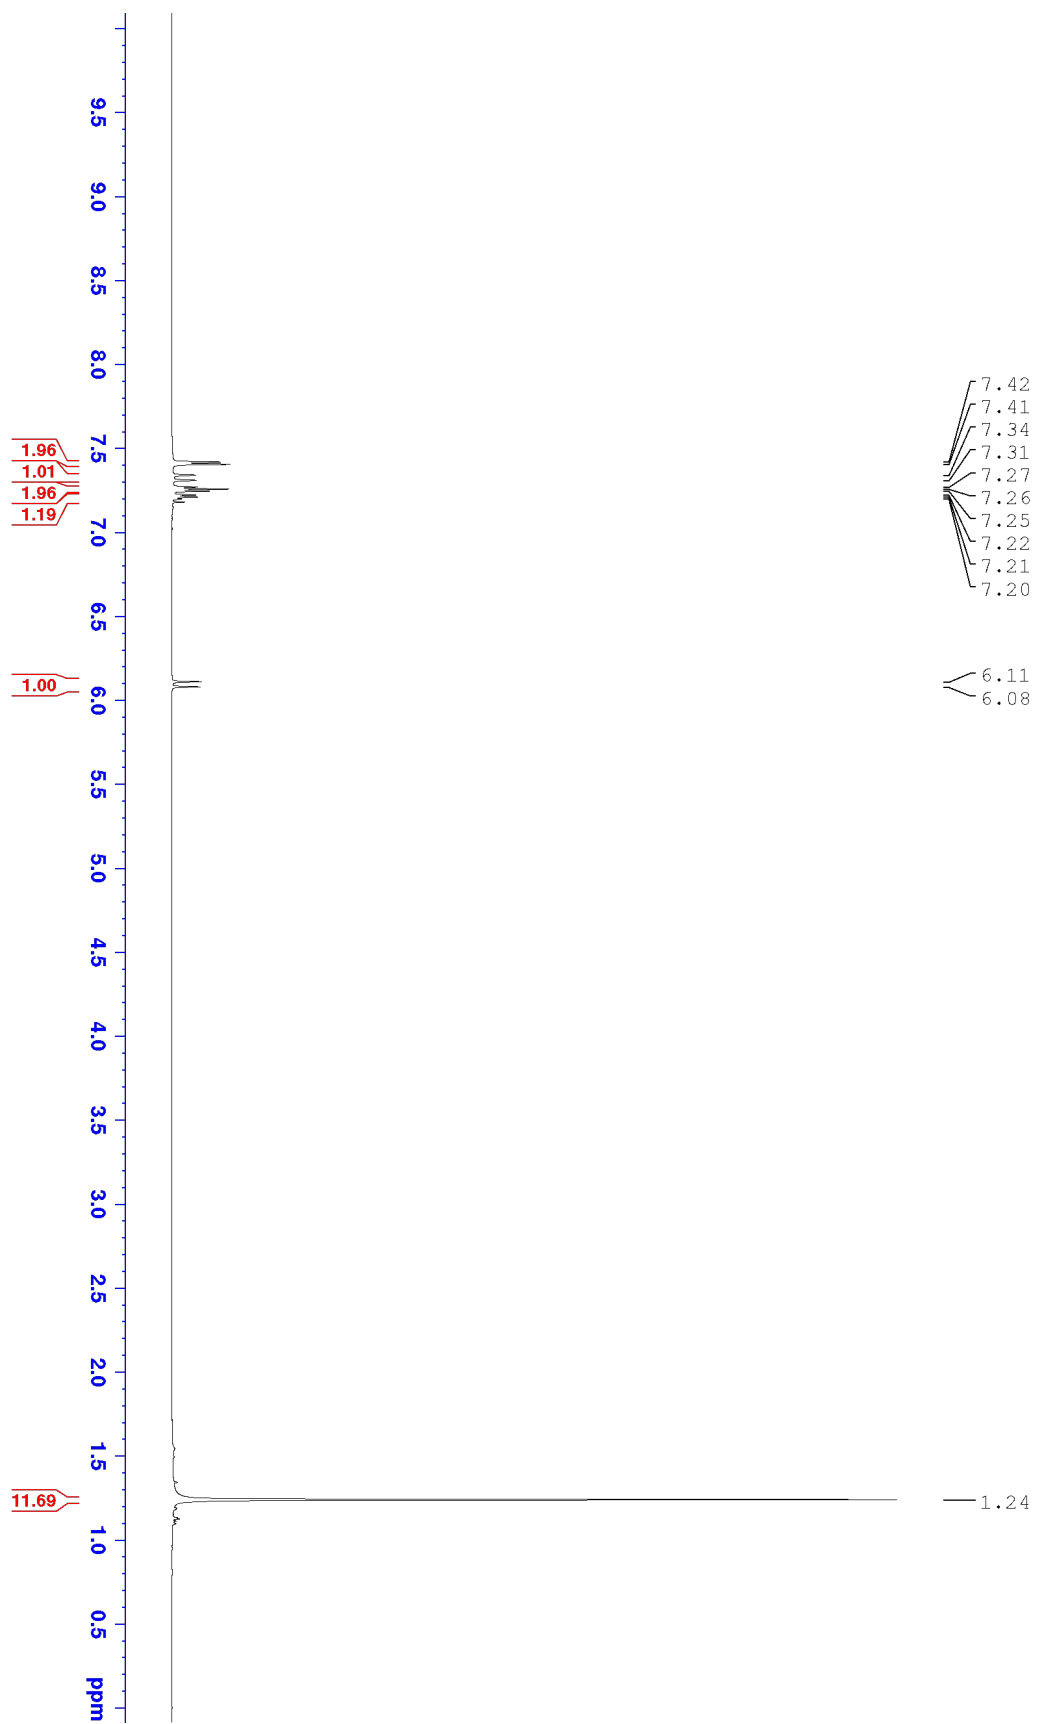

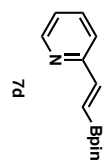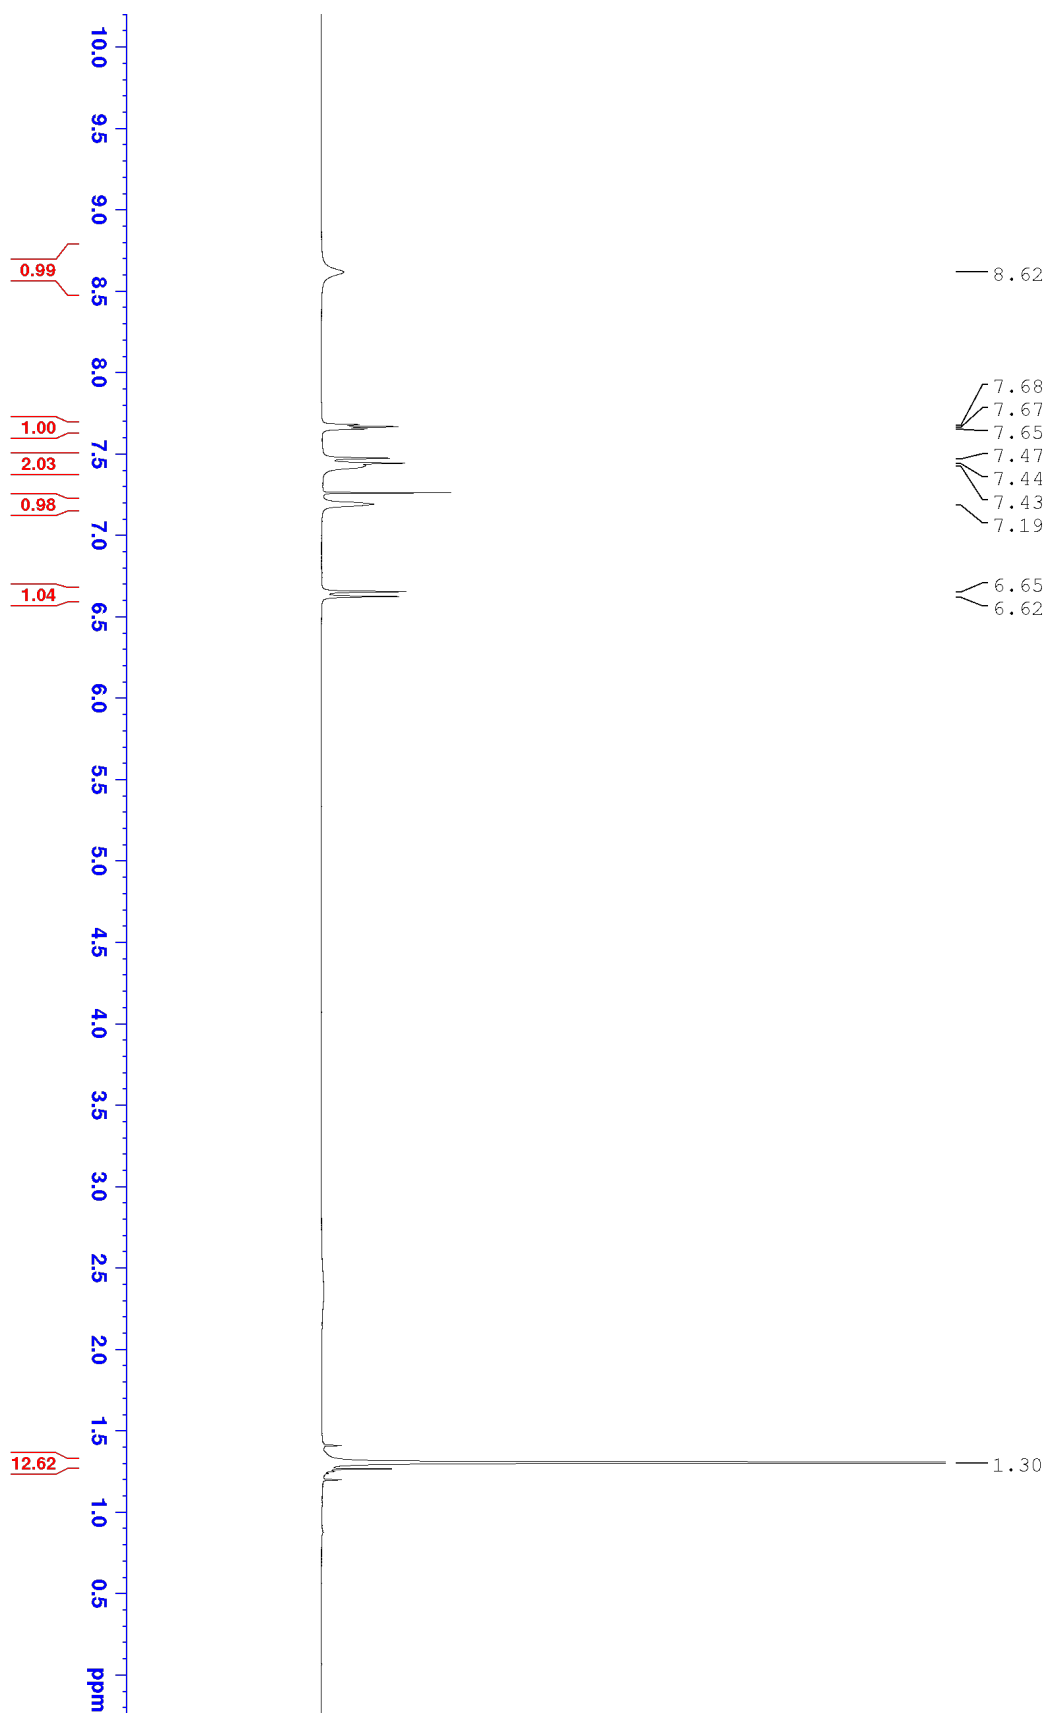

Supplement: d3dt04269c1.pdf [file d3dt04269c1.pdf]
